# Supplementary material for: A Convenient Synthesis of C‐3‐Aryloxymethyl Imidazo[1,2‐a]Pyridine Derivatives
Source: Hindawi journal article supplement (doi:10.1155/2013/296792), 2012-10-21

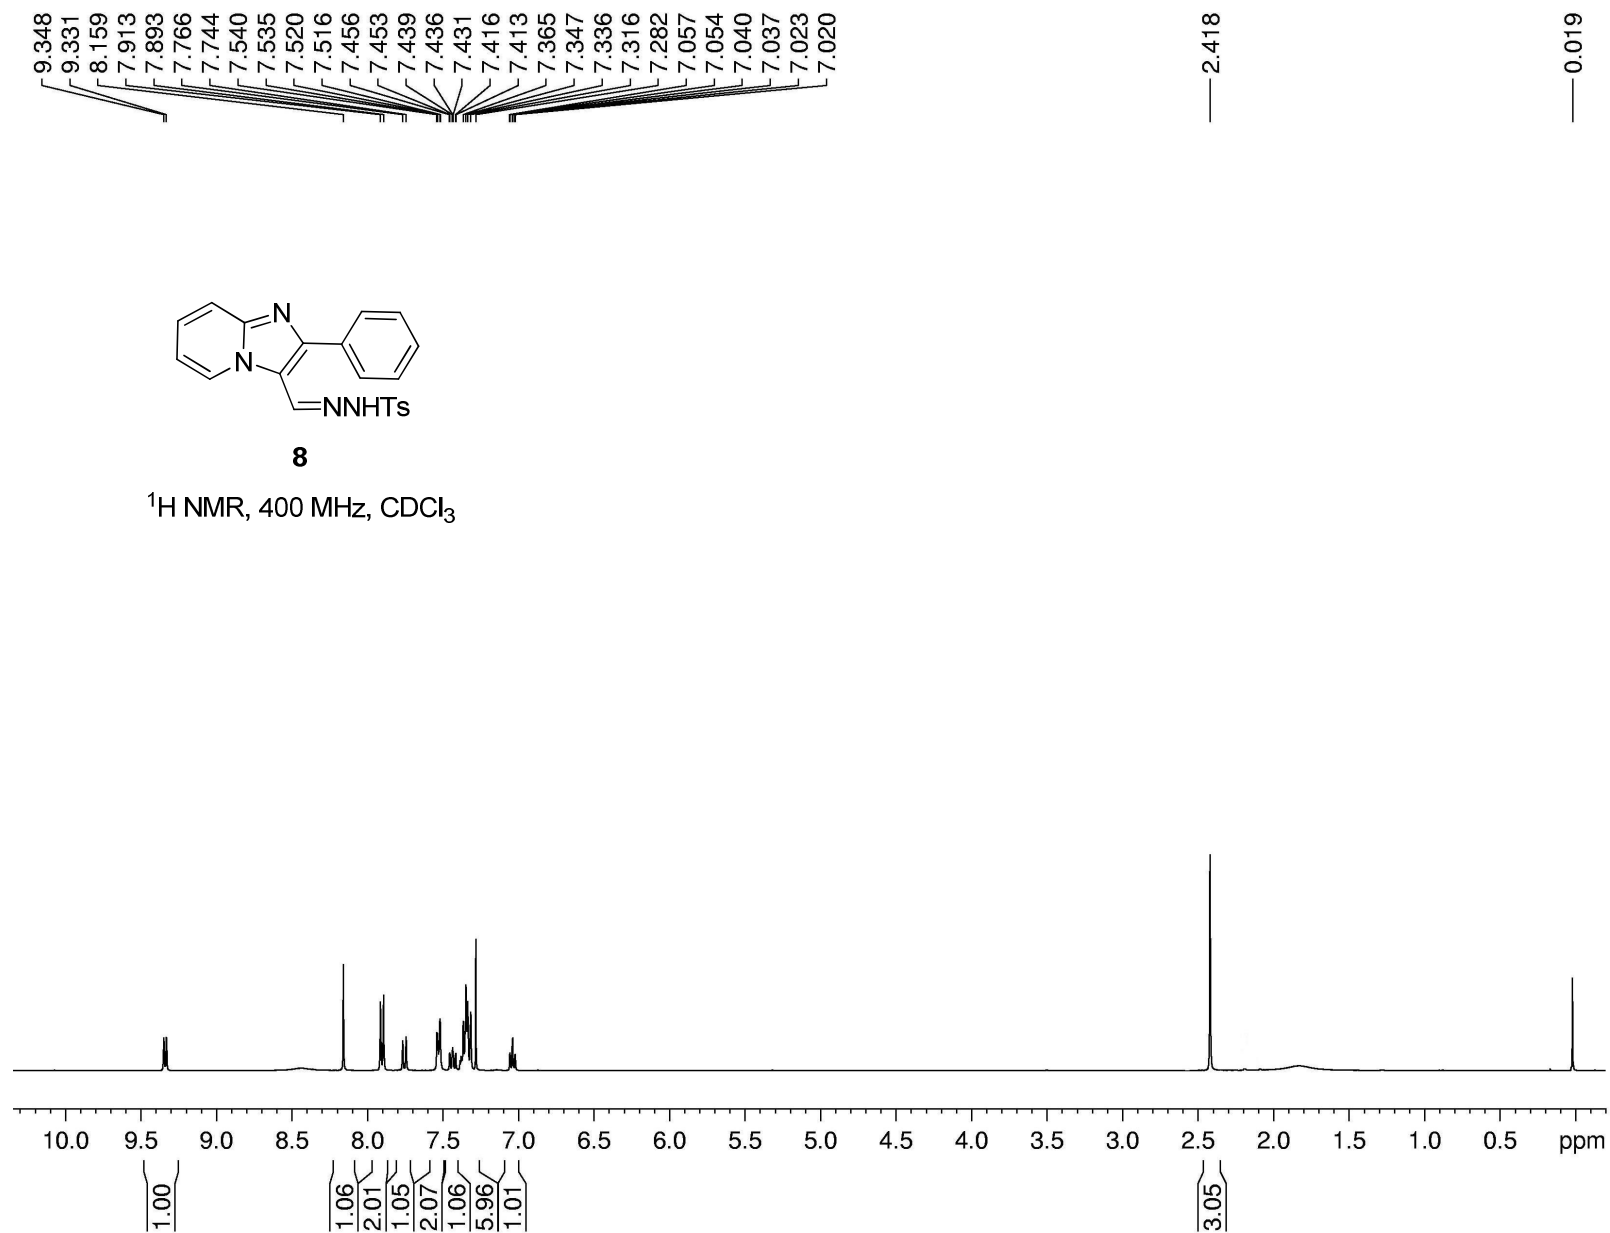

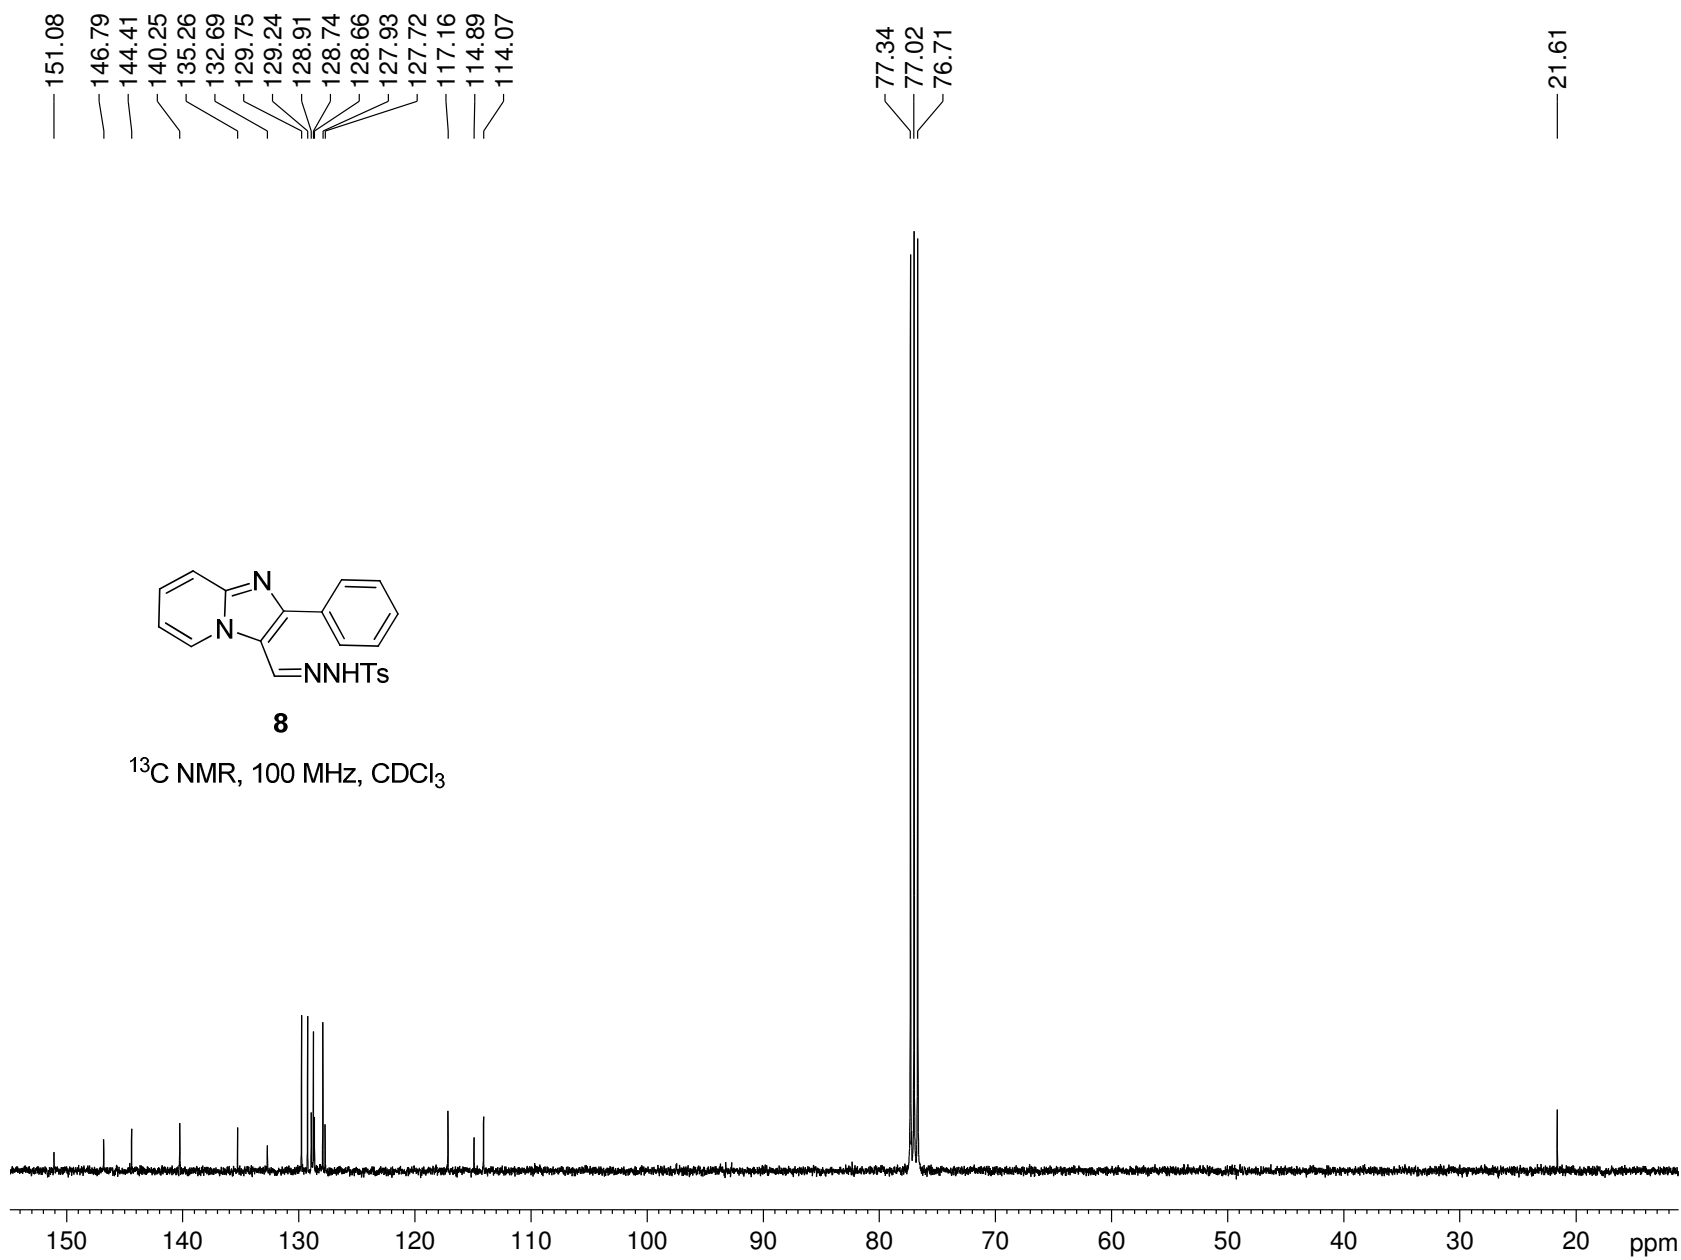

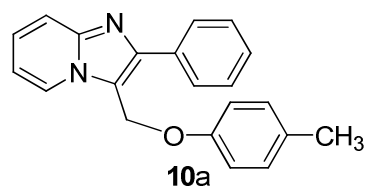

$^1\text{H}$  NMR, 400 MHz,  $\text{CDCl}_3$

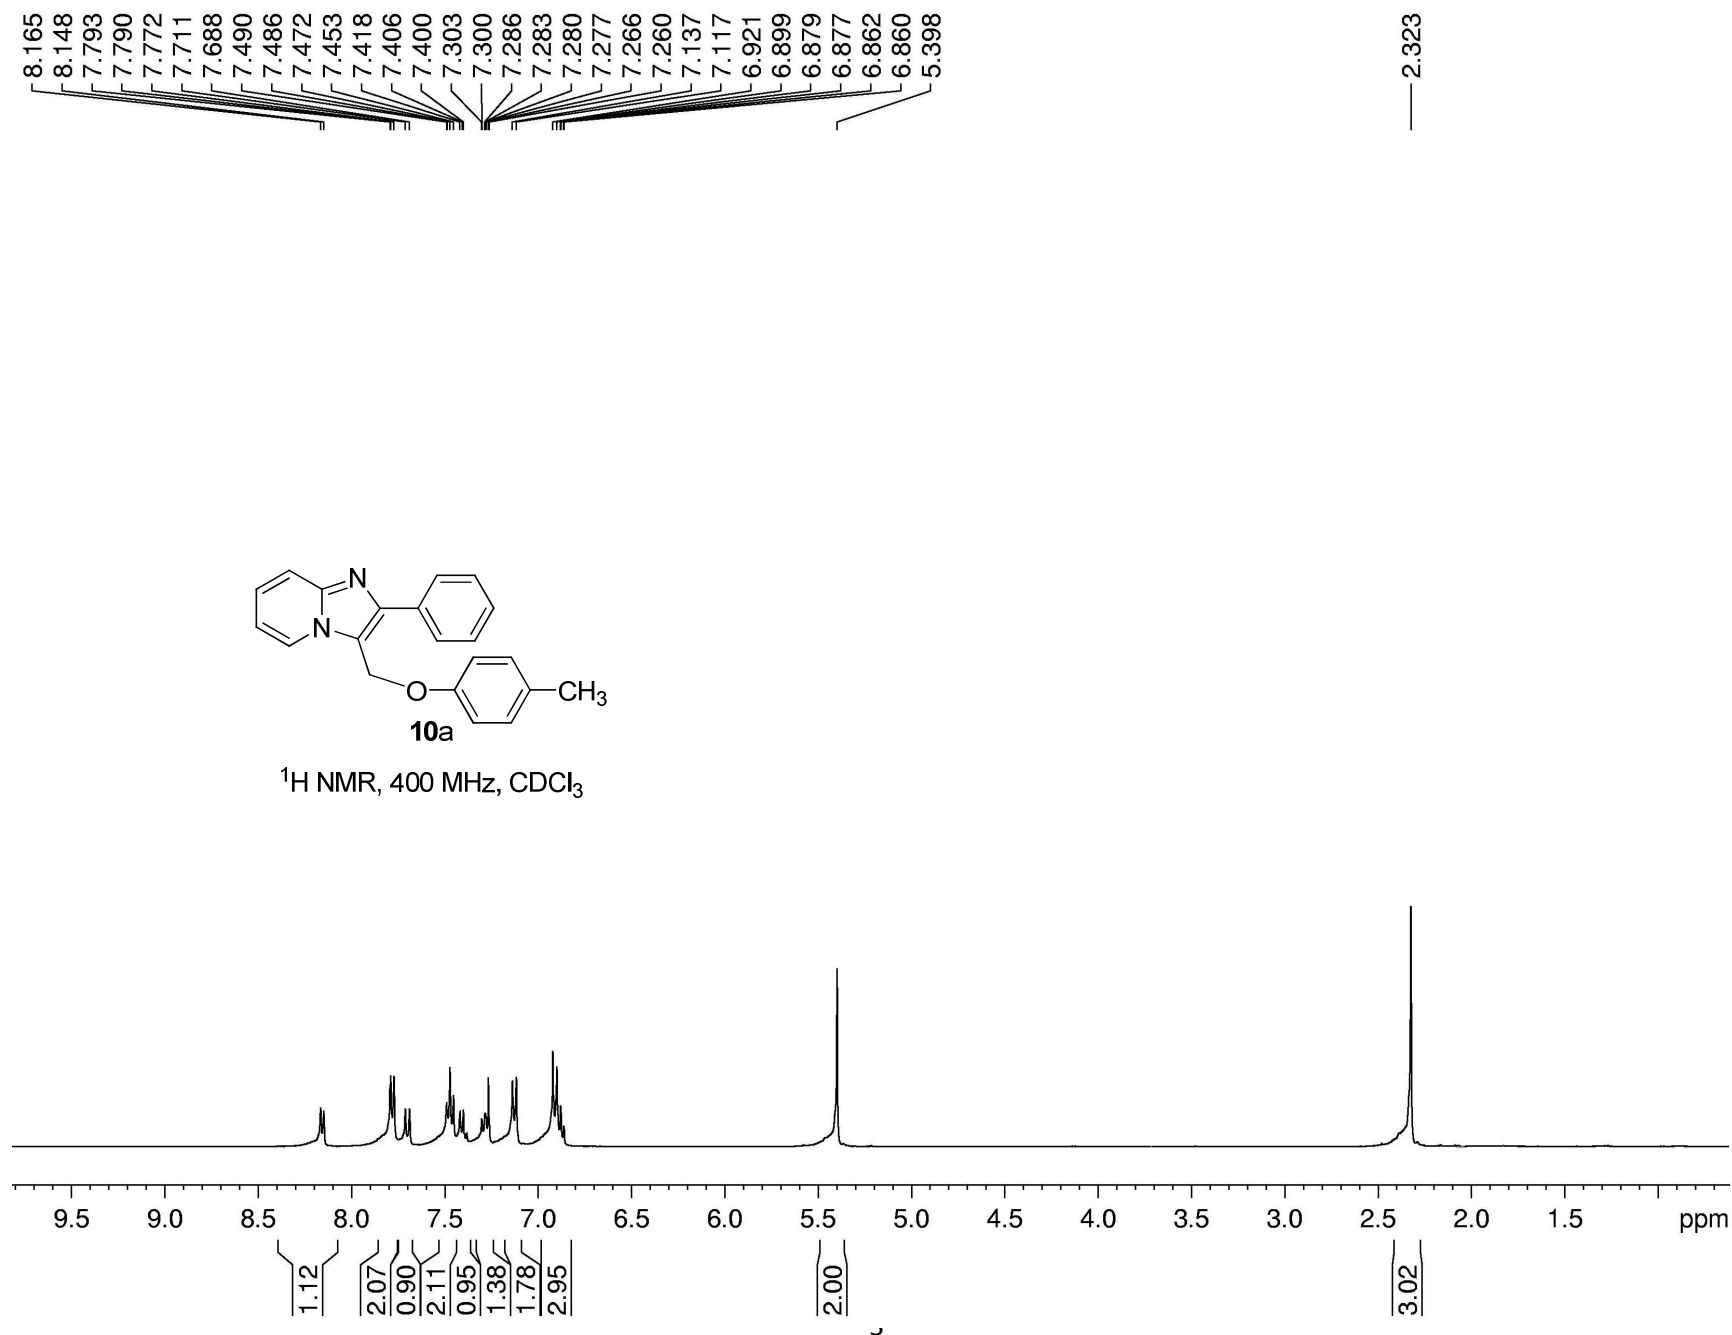

— 156.03  
 — 146.20  
 — 145.53  
 — 133.88  
 — 130.96  
 — 130.09  
 — 128.72  
 — 128.18  
 — 125.33  
 — 124.16  
 — 117.66  
 — 115.53  
 — 114.82  
 — 112.67

— 77.33  
 — 77.02  
 — 76.70

— 60.05

— 20.50

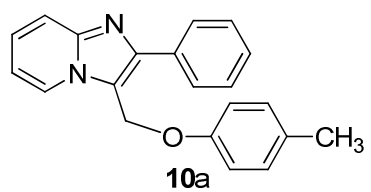

$^{13}\text{C}$  NMR, 100 MHz,  $\text{CDCl}_3$

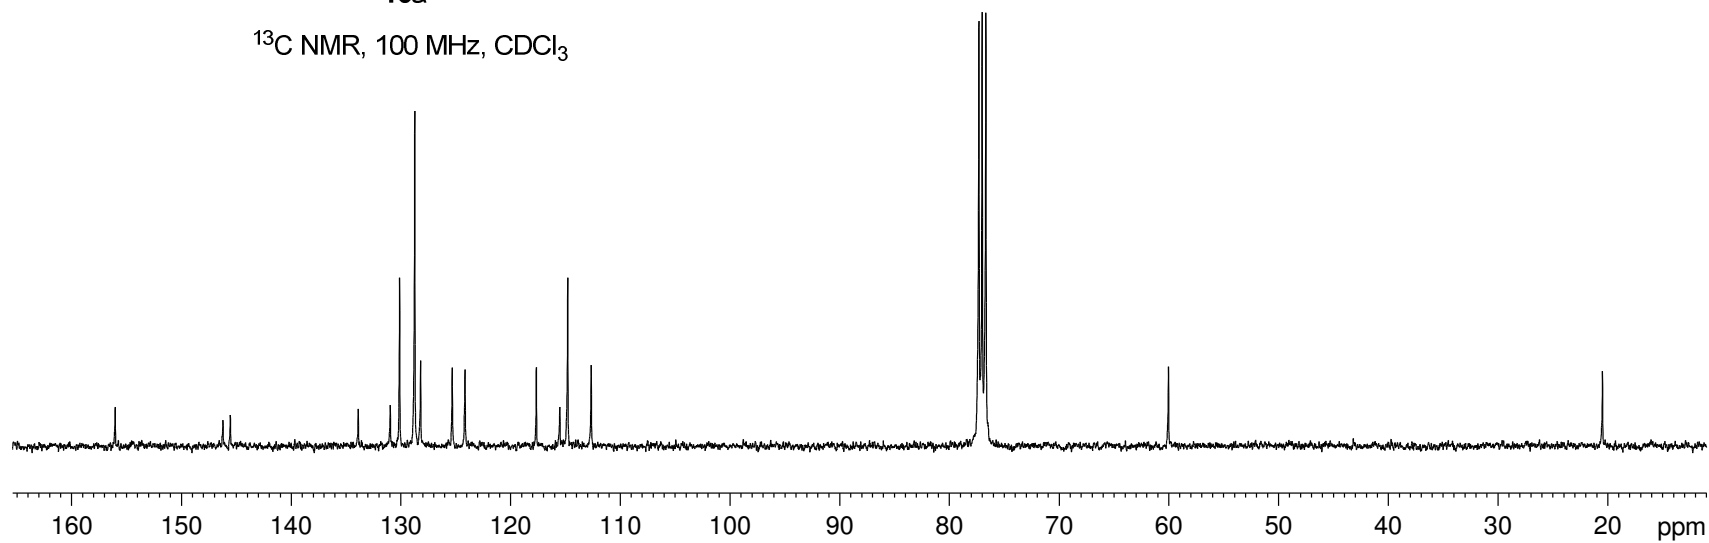

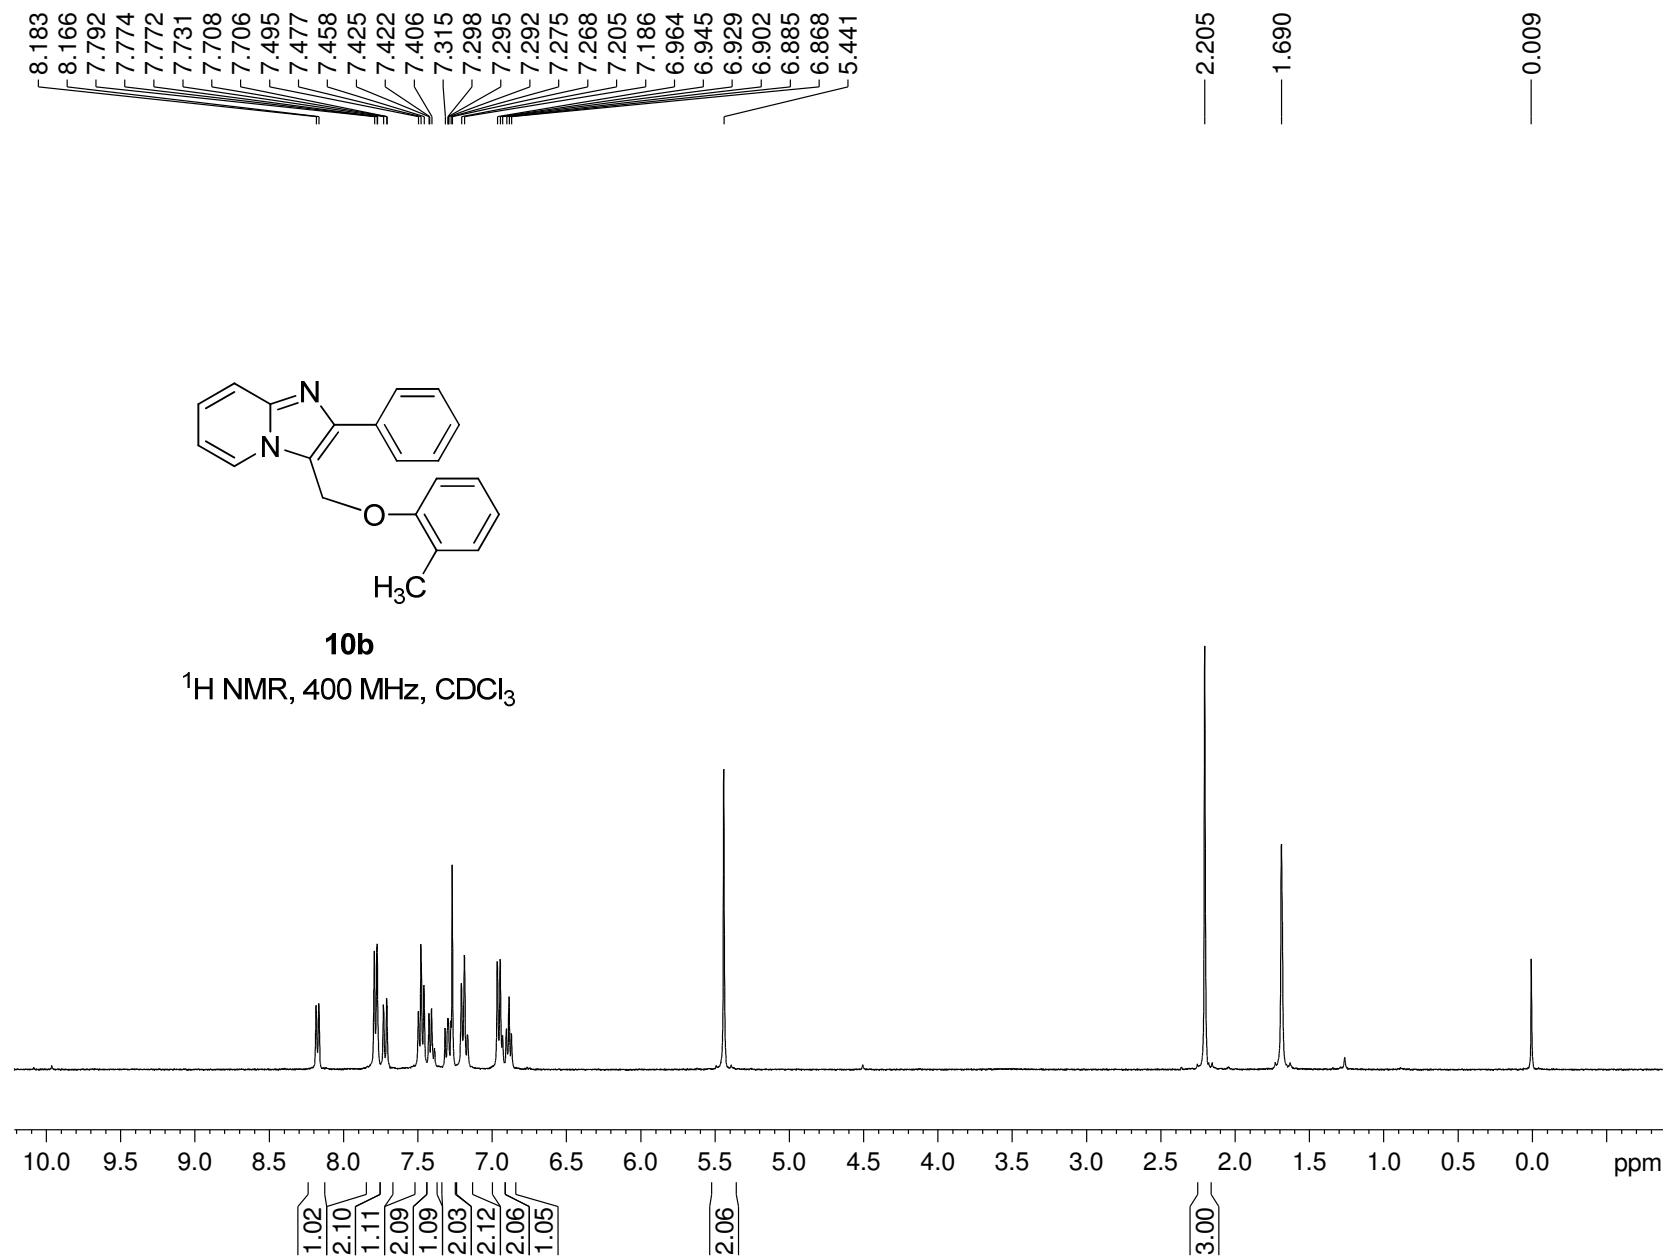

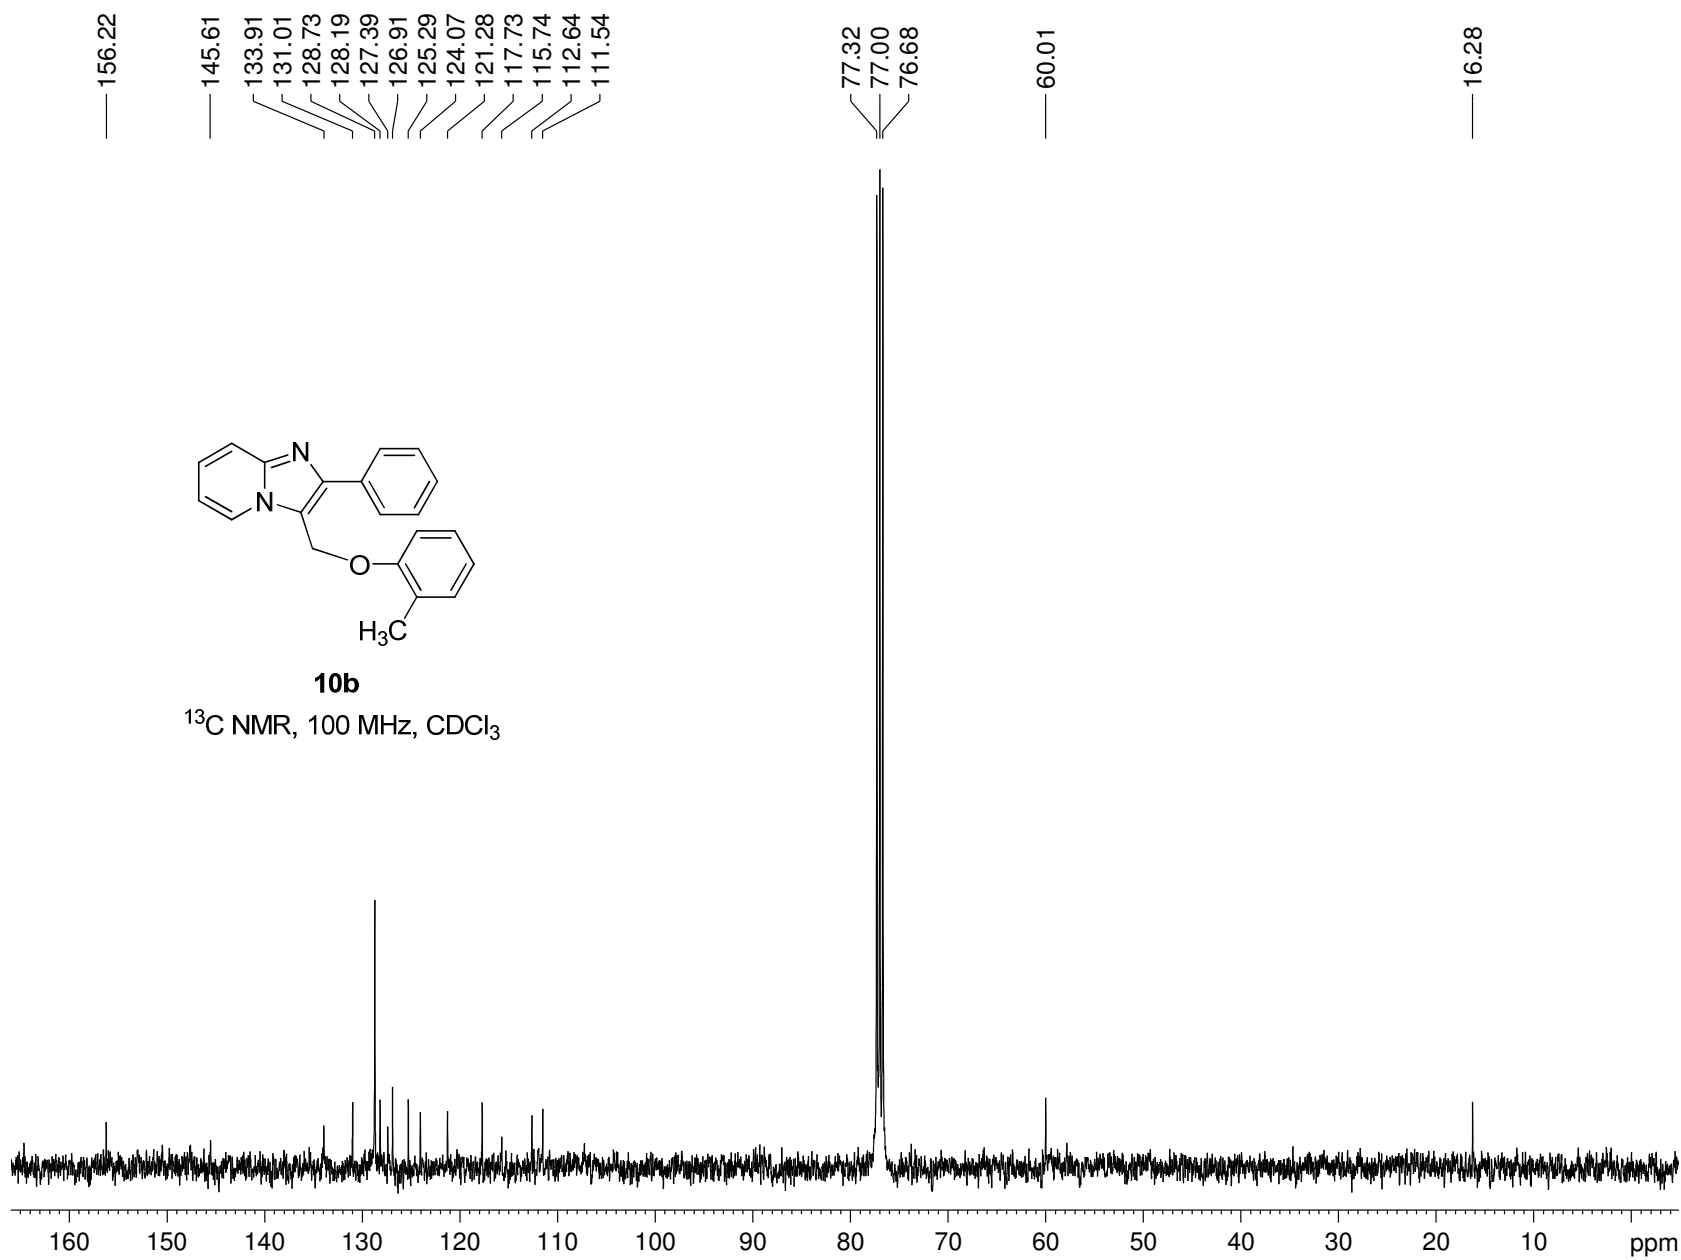

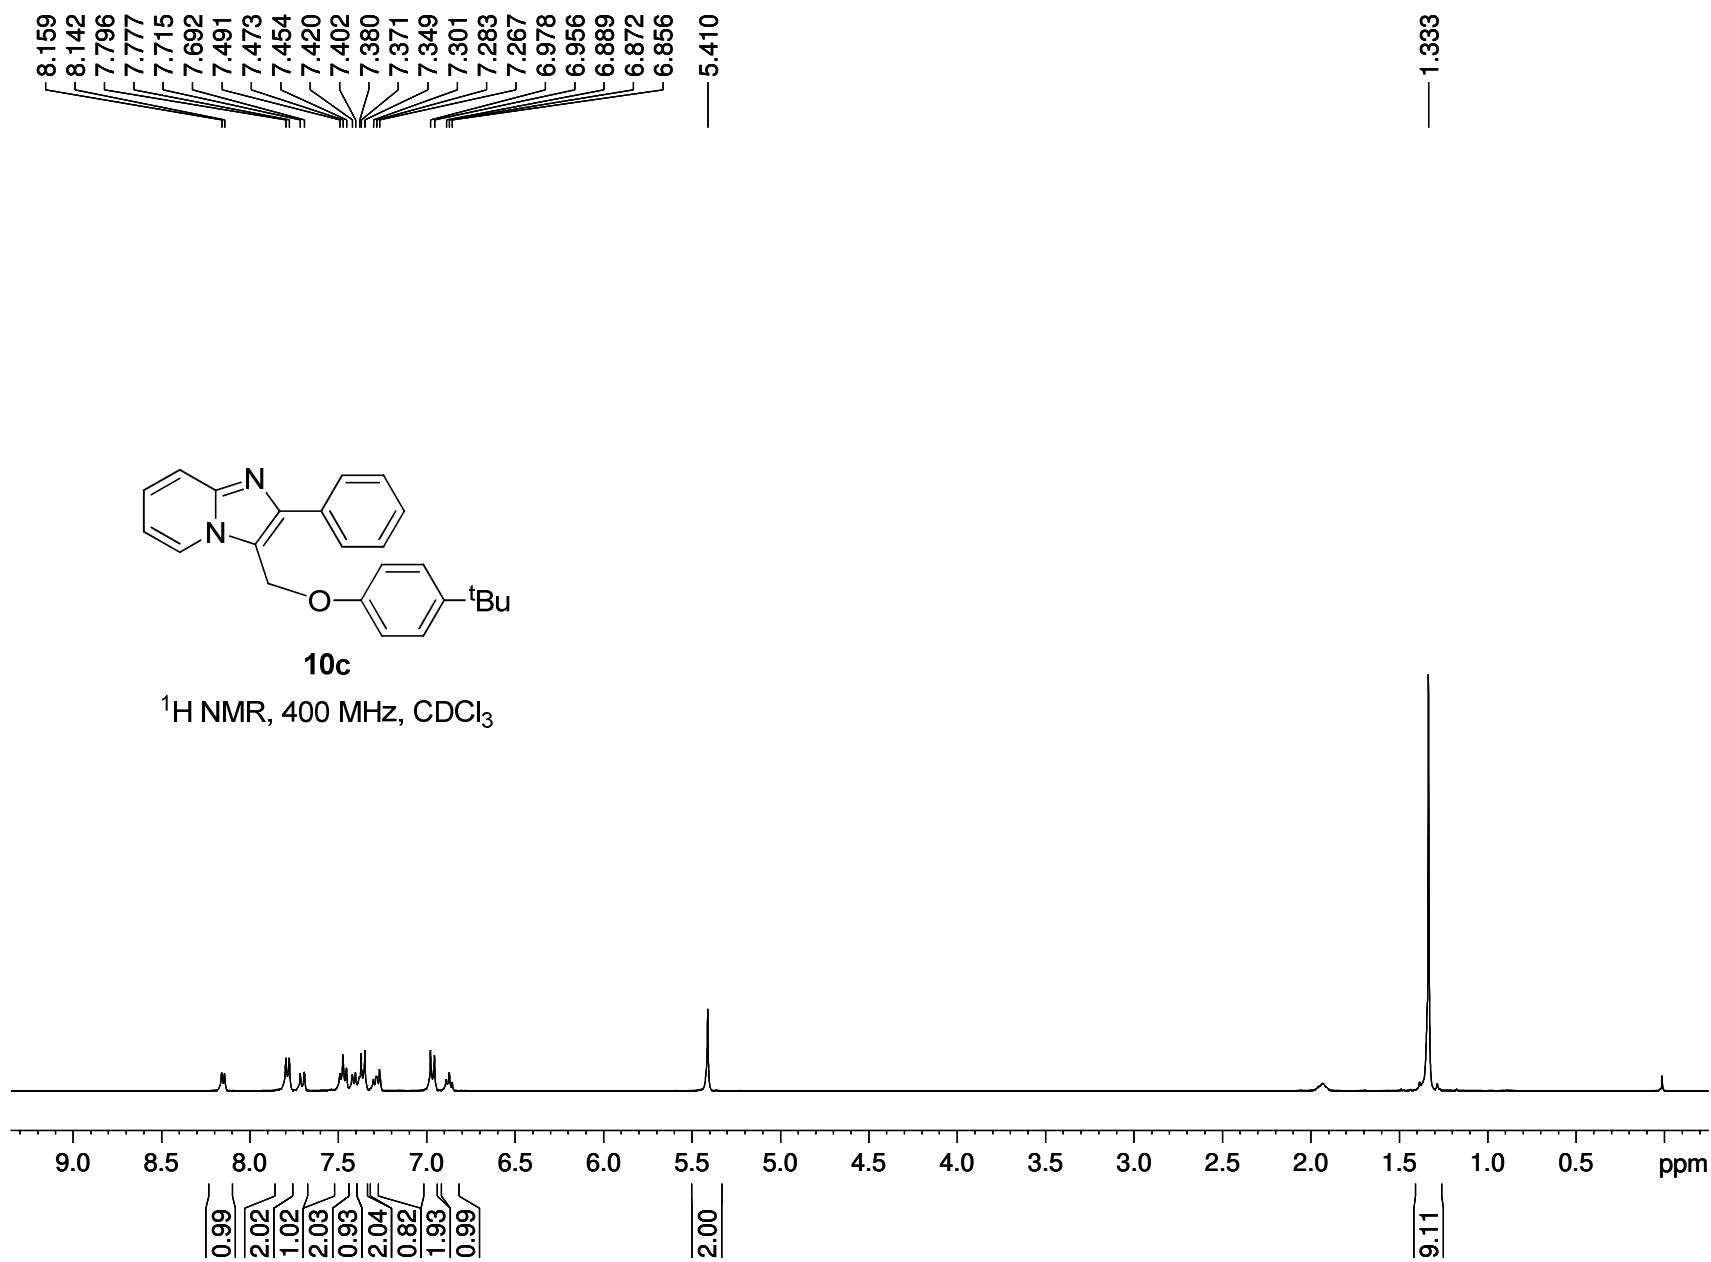

— 155.89  
 — 146.19  
 — 145.53  
 — 144.40  
 — 133.86  
 — 128.71  
 — 128.17  
 — 126.44  
 — 125.31  
 — 124.14  
 — 117.64  
 — 115.47  
 — 114.39  
 — 112.64

— 77.32  
 — 77.00  
 — 76.68

— 59.94

— 34.13  
 — 31.48

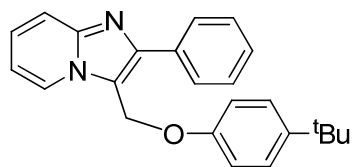

**10c**

$^{13}\text{C}$  NMR, 100 MHz,  $\text{CDCl}_3$

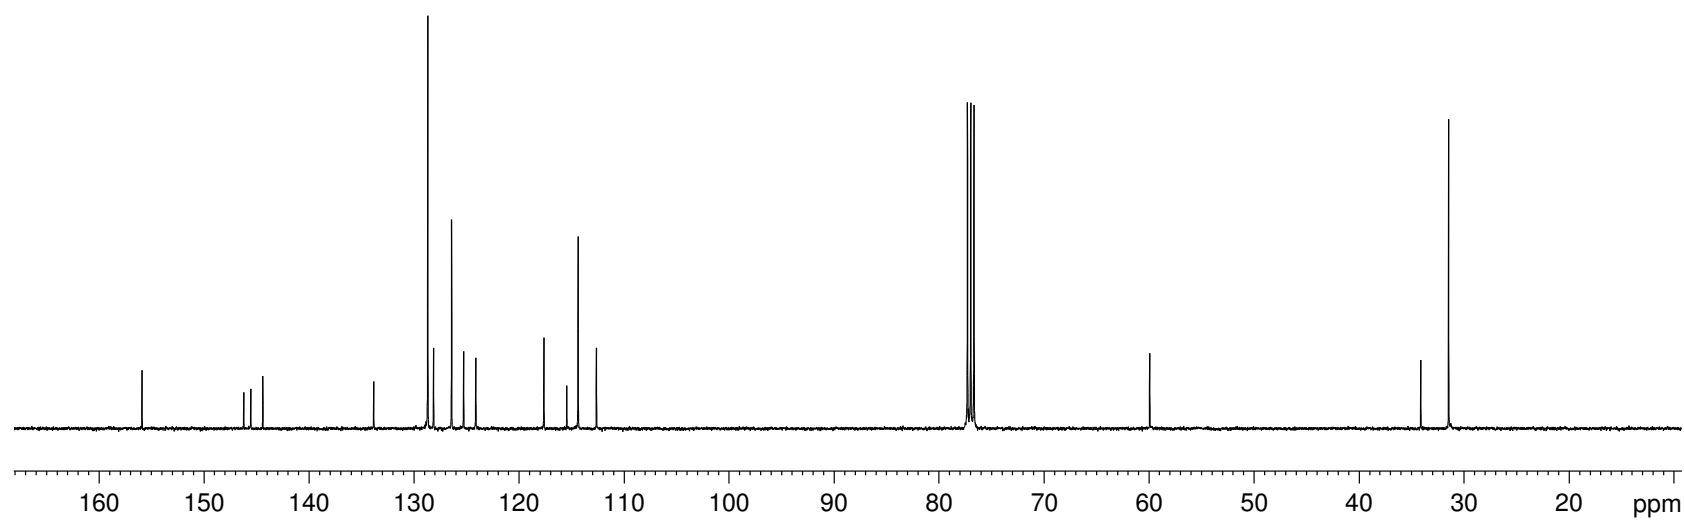



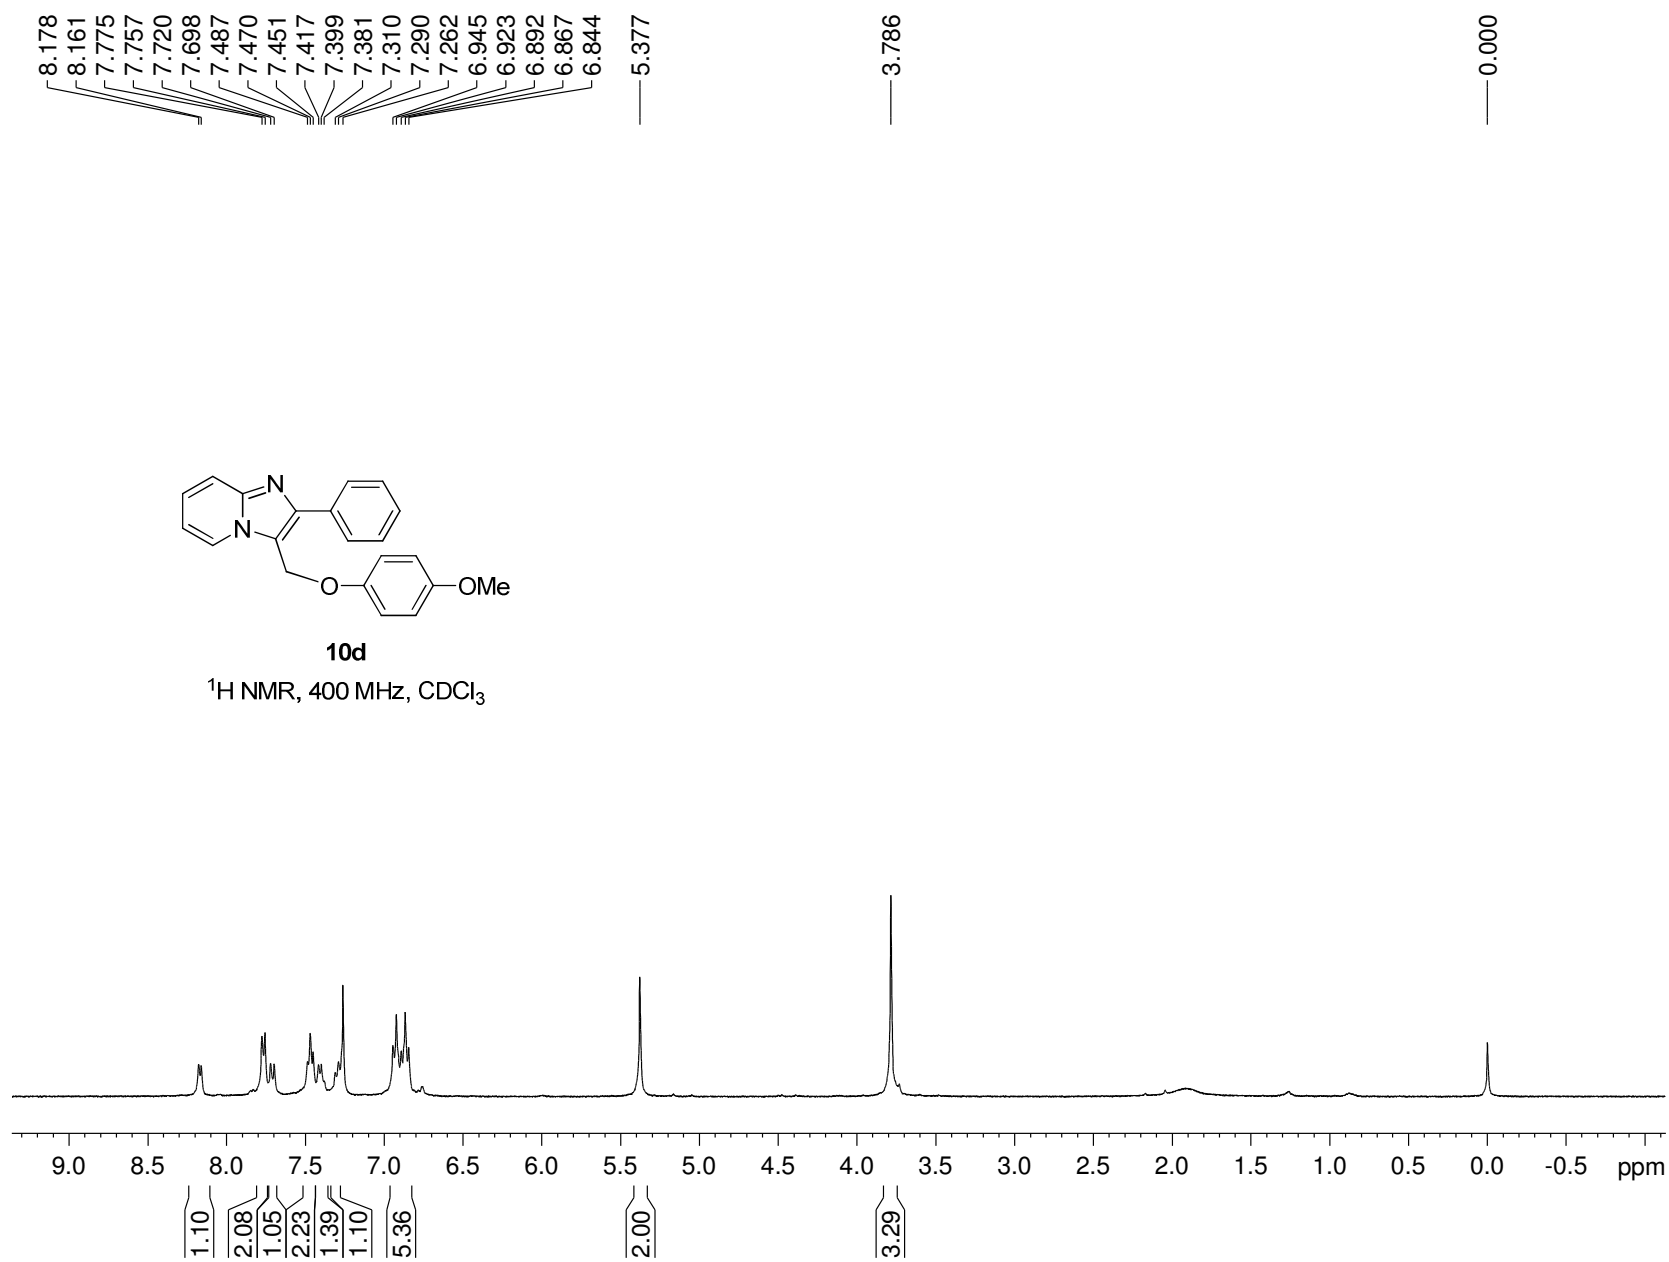

— 154.57  
— 152.23

— 146.27  
— 145.55

— 133.95

— 128.74

— 128.20

— 125.32

— 124.19

— 117.70

— 116.21

— 115.66

— 114.83

— 112.68

— 77.36  
— 77.04  
— 76.73

— 60.81

— 55.76

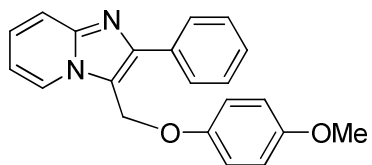

**10d**

$^{13}\text{C}$  NMR, 100 MHz,  $\text{CDCl}_3$

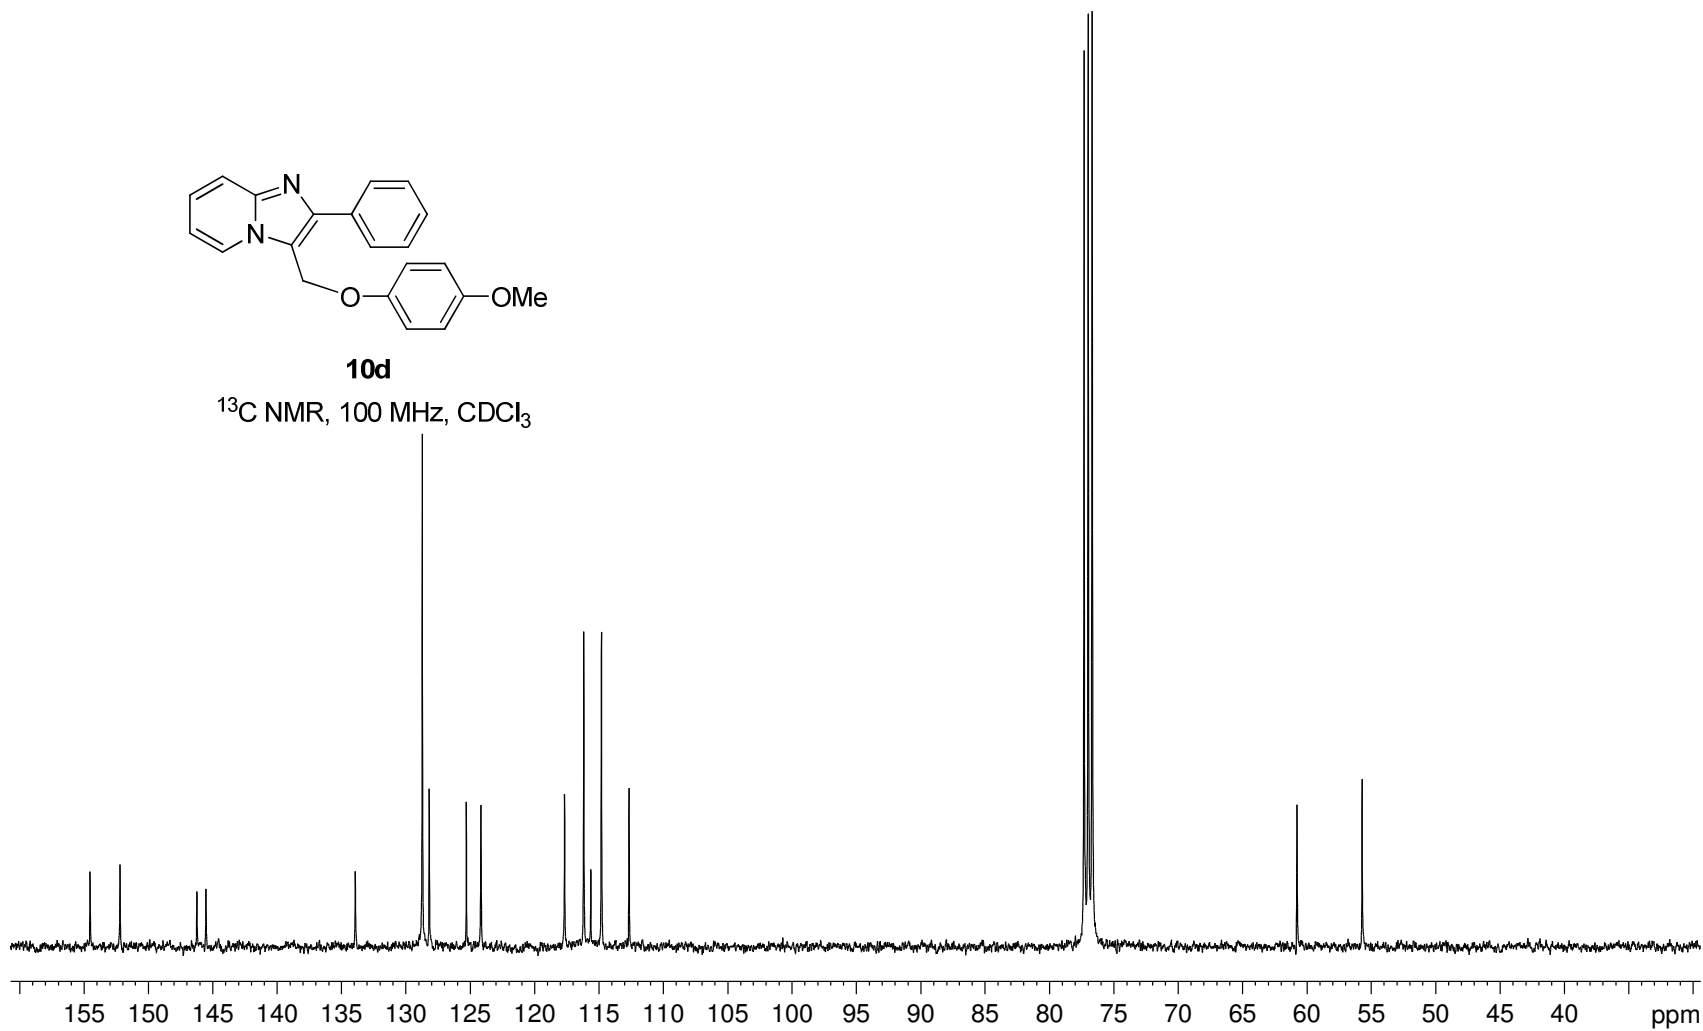

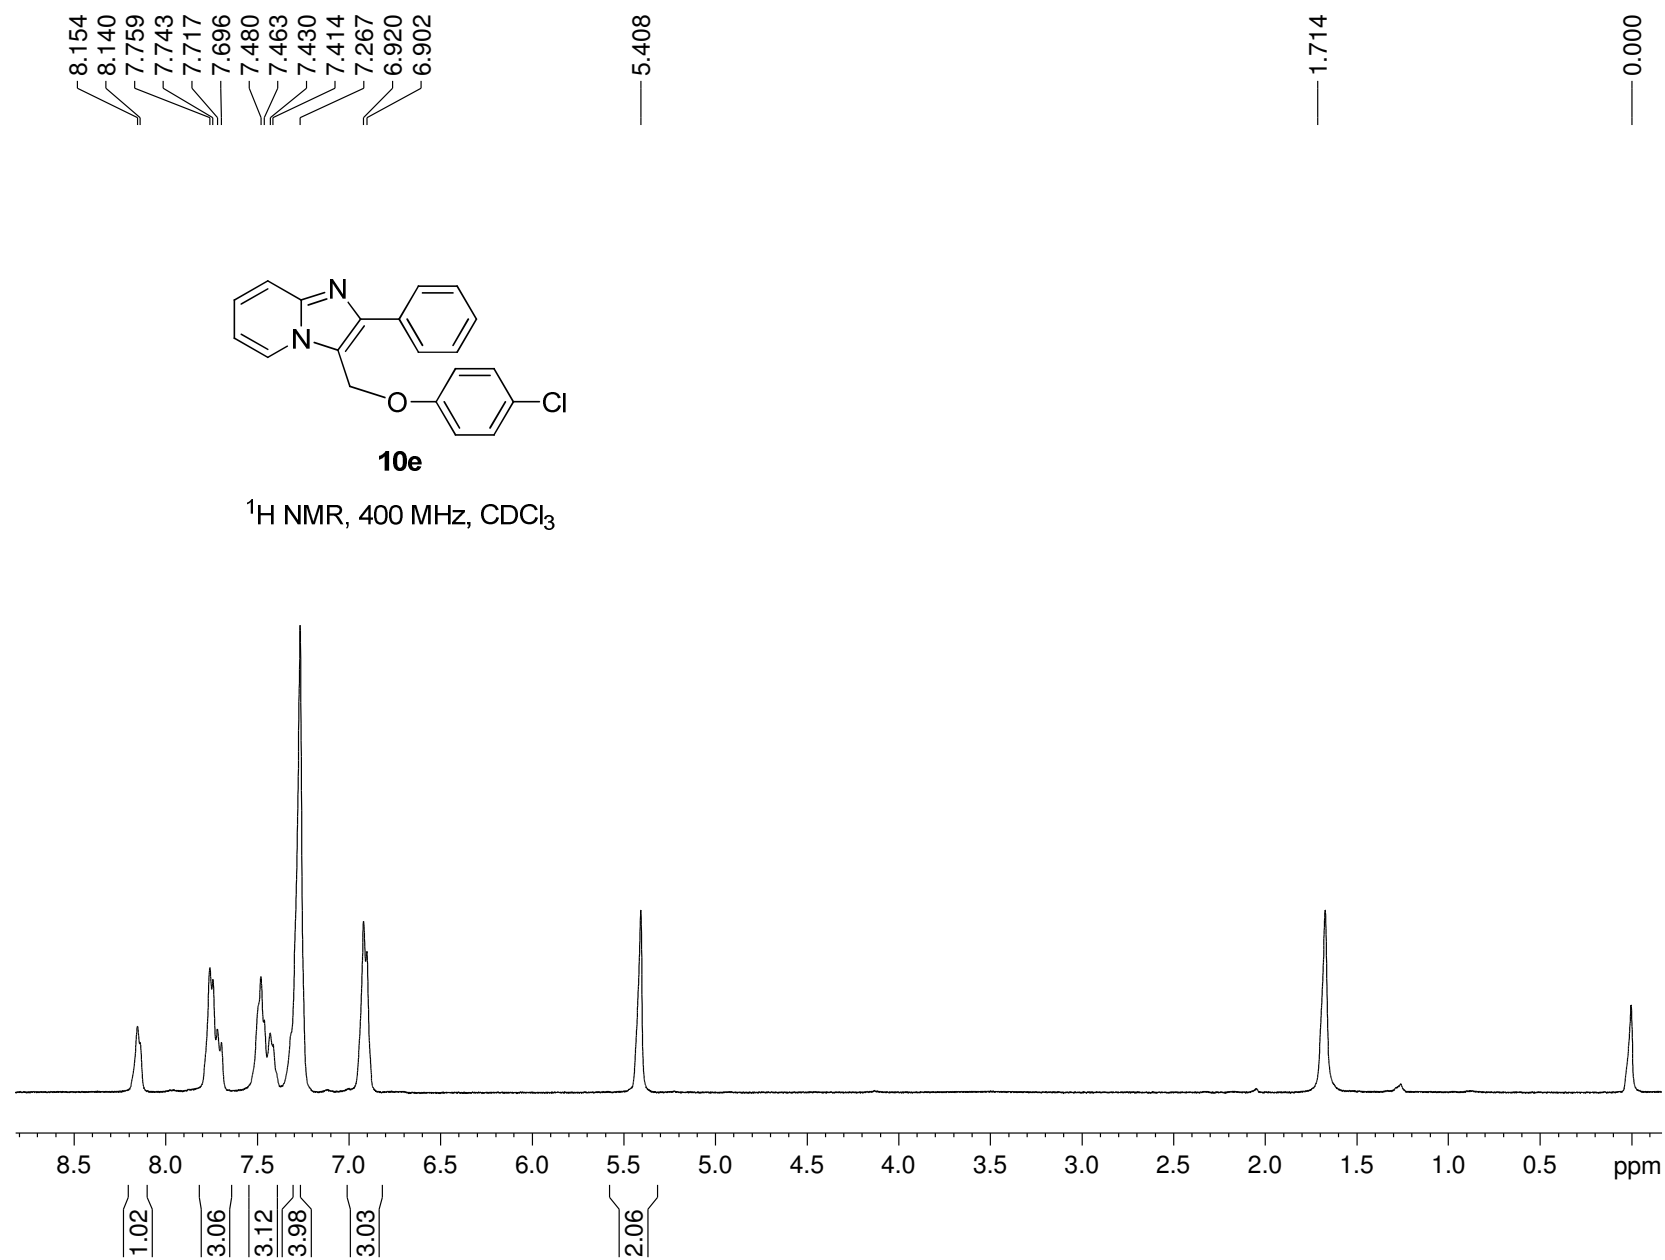

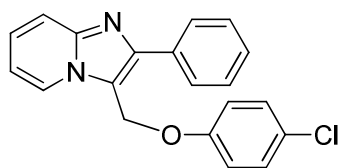

**10e**

$^{13}\text{C}$  NMR, 100 MHz,  $\text{CDCl}_3$

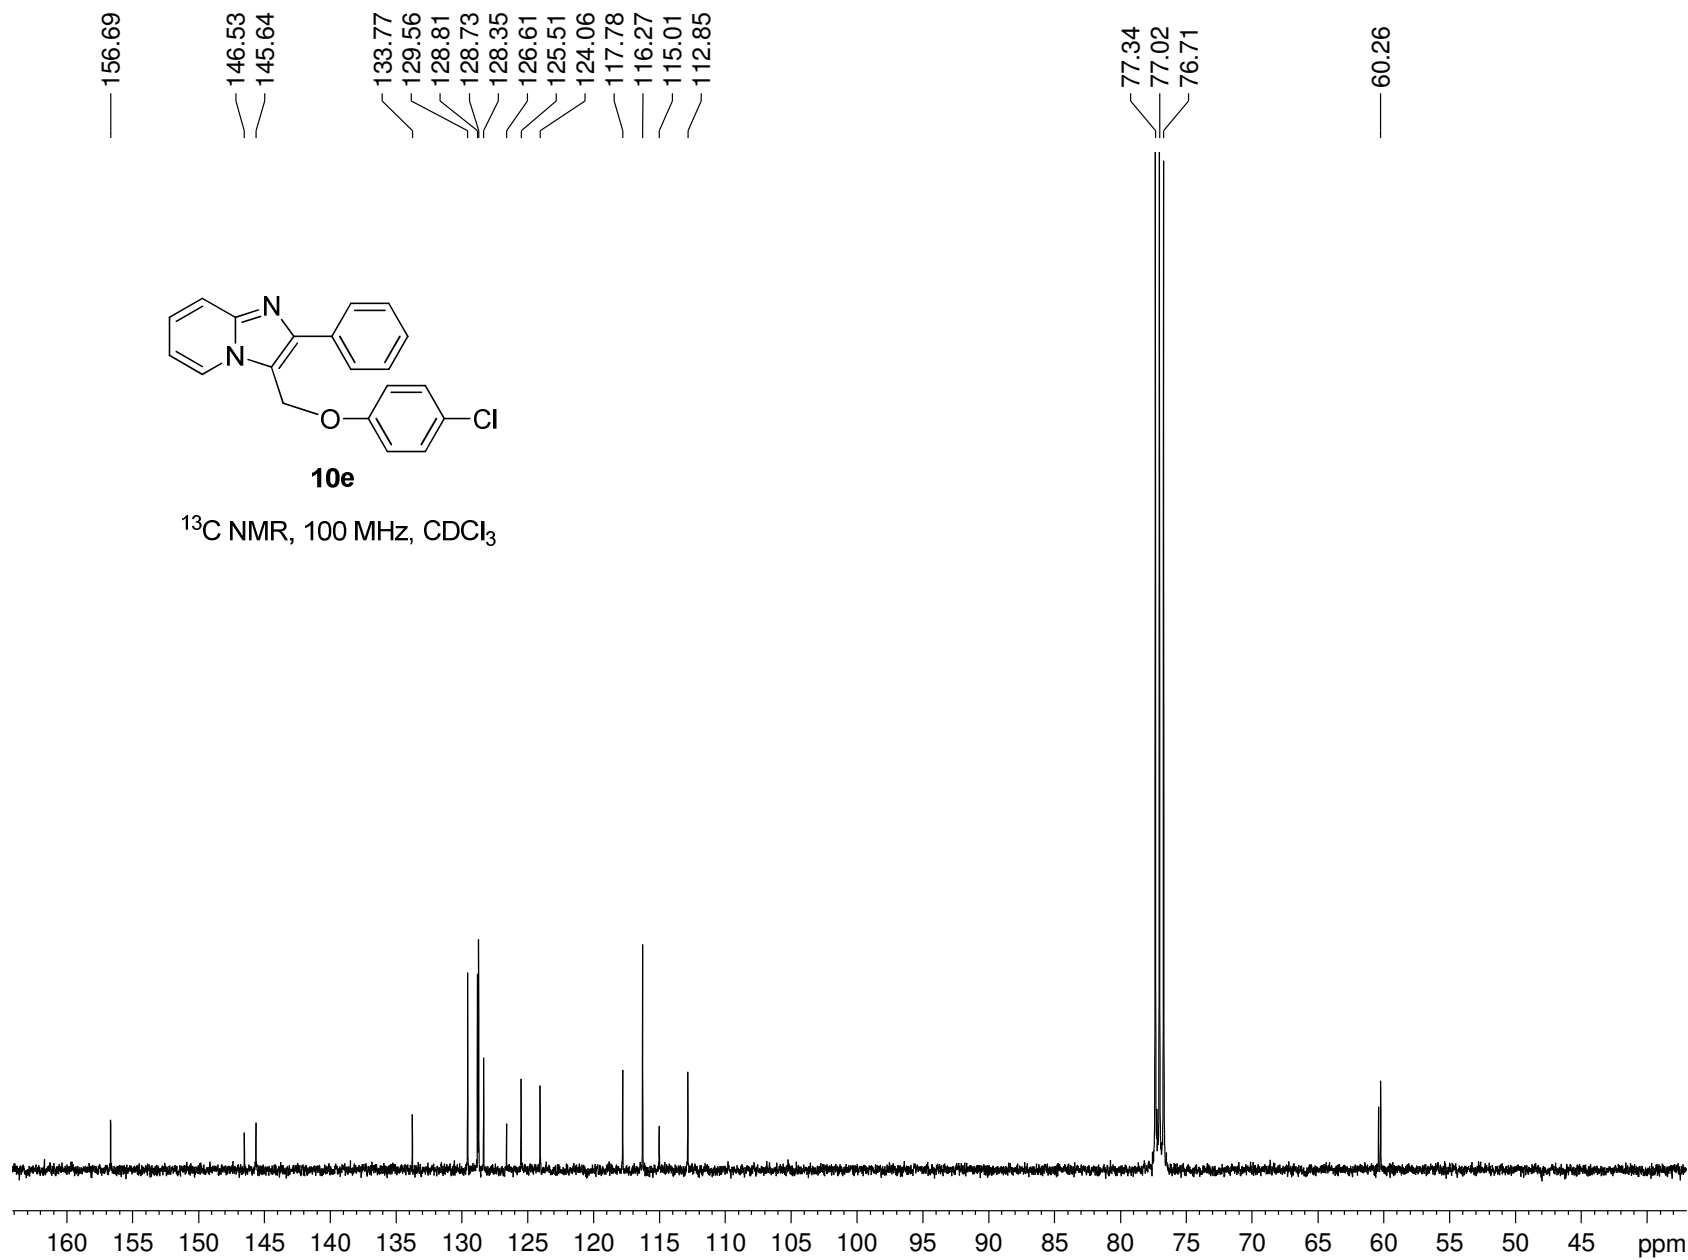

8.420  
8.403  
7.669  
7.646  
7.362  
7.342  
7.312  
7.302  
7.294  
7.170  
7.150  
7.128  
7.108  
7.058  
7.038  
6.906  
6.889  
6.872

4.849

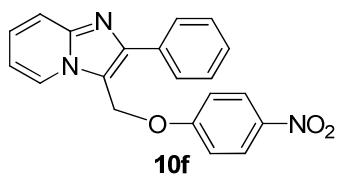

$^1\text{H}$  NMR, 400 MHz,  $\text{CDCl}_3$

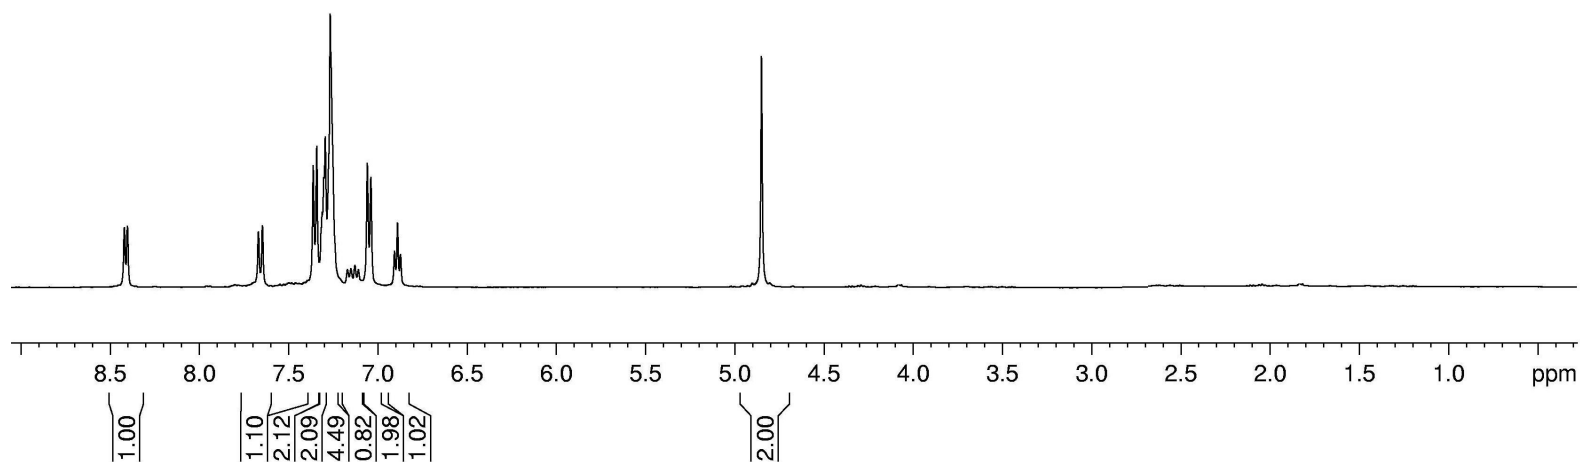

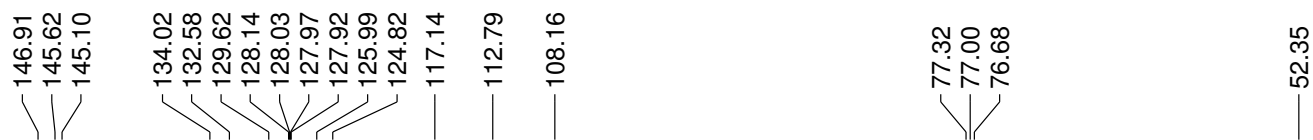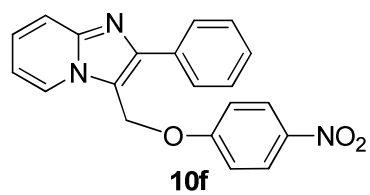

$^{13}\text{C}$  NMR, 100 MHz,  $\text{CDCl}_3$

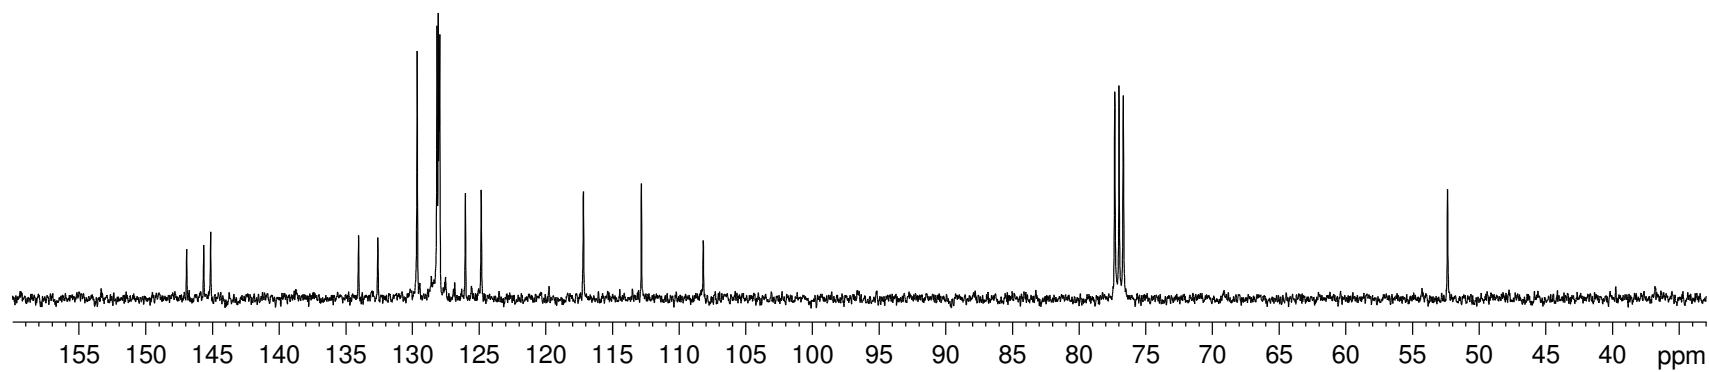

8.171  
8.154  
7.803  
7.784  
7.728  
7.706  
7.495  
7.476  
7.458  
7.422  
7.404  
7.301  
7.281  
7.267  
7.016  
6.983  
6.962  
6.886  
6.869  
6.851  
6.830

— 5.400

— 2.297  
— 2.180

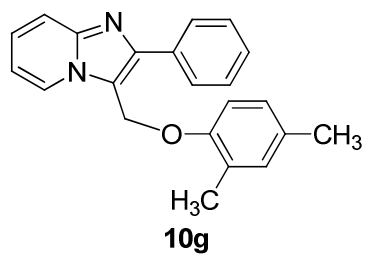

$^1\text{H}$  NMR, 400 MHz,  $\text{CDCl}_3$

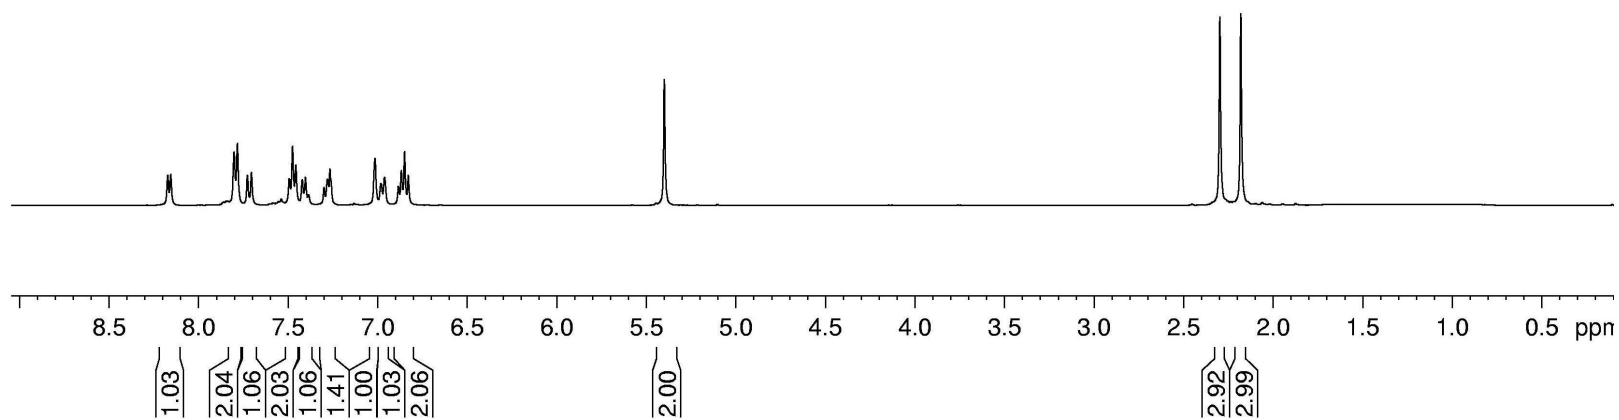

— 154.06  
 — 146.05  
 — 145.44  
 — 133.89  
 — 131.78  
 — 130.55  
 — 128.67  
 — 128.11  
 — 127.09  
 — 127.01  
 — 125.19  
 — 124.03  
 — 117.63  
 — 115.86  
 — 112.54  
 — 111.62

77.32  
 77.00  
 76.68

— 60.12

— 20.41  
 — 16.16

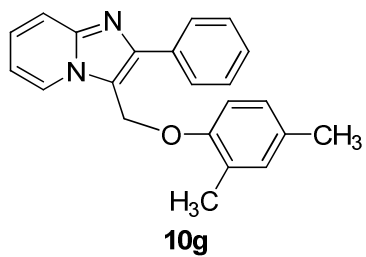

$^{13}\text{C}$  NMR, 100 MHz,  $\text{CDCl}_3$

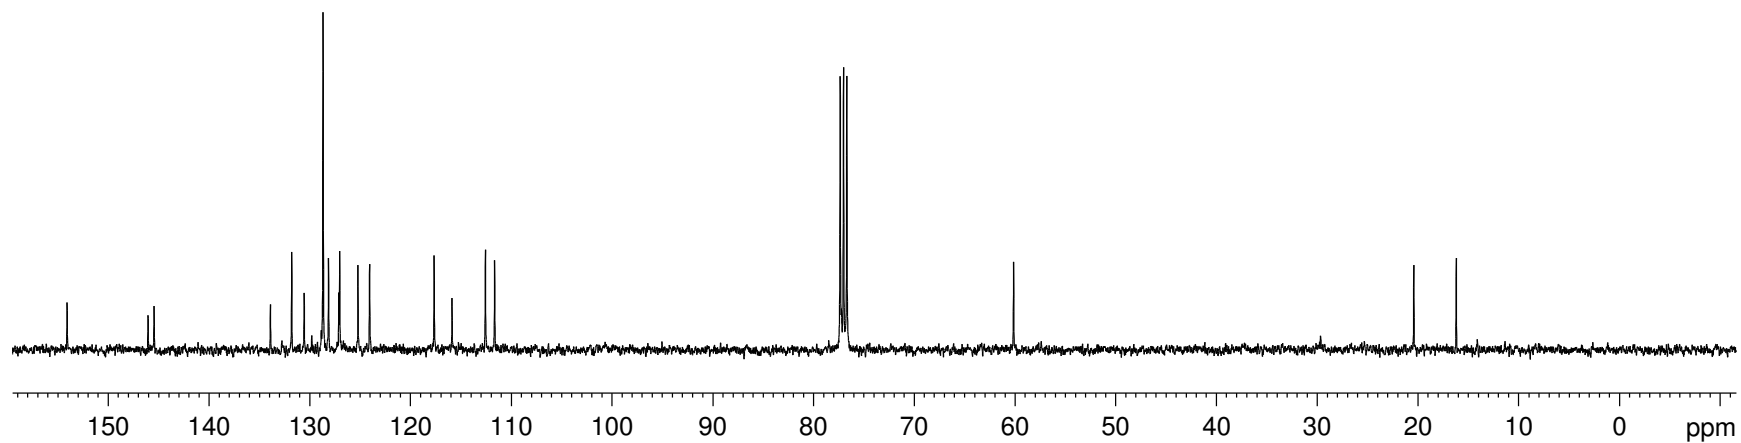



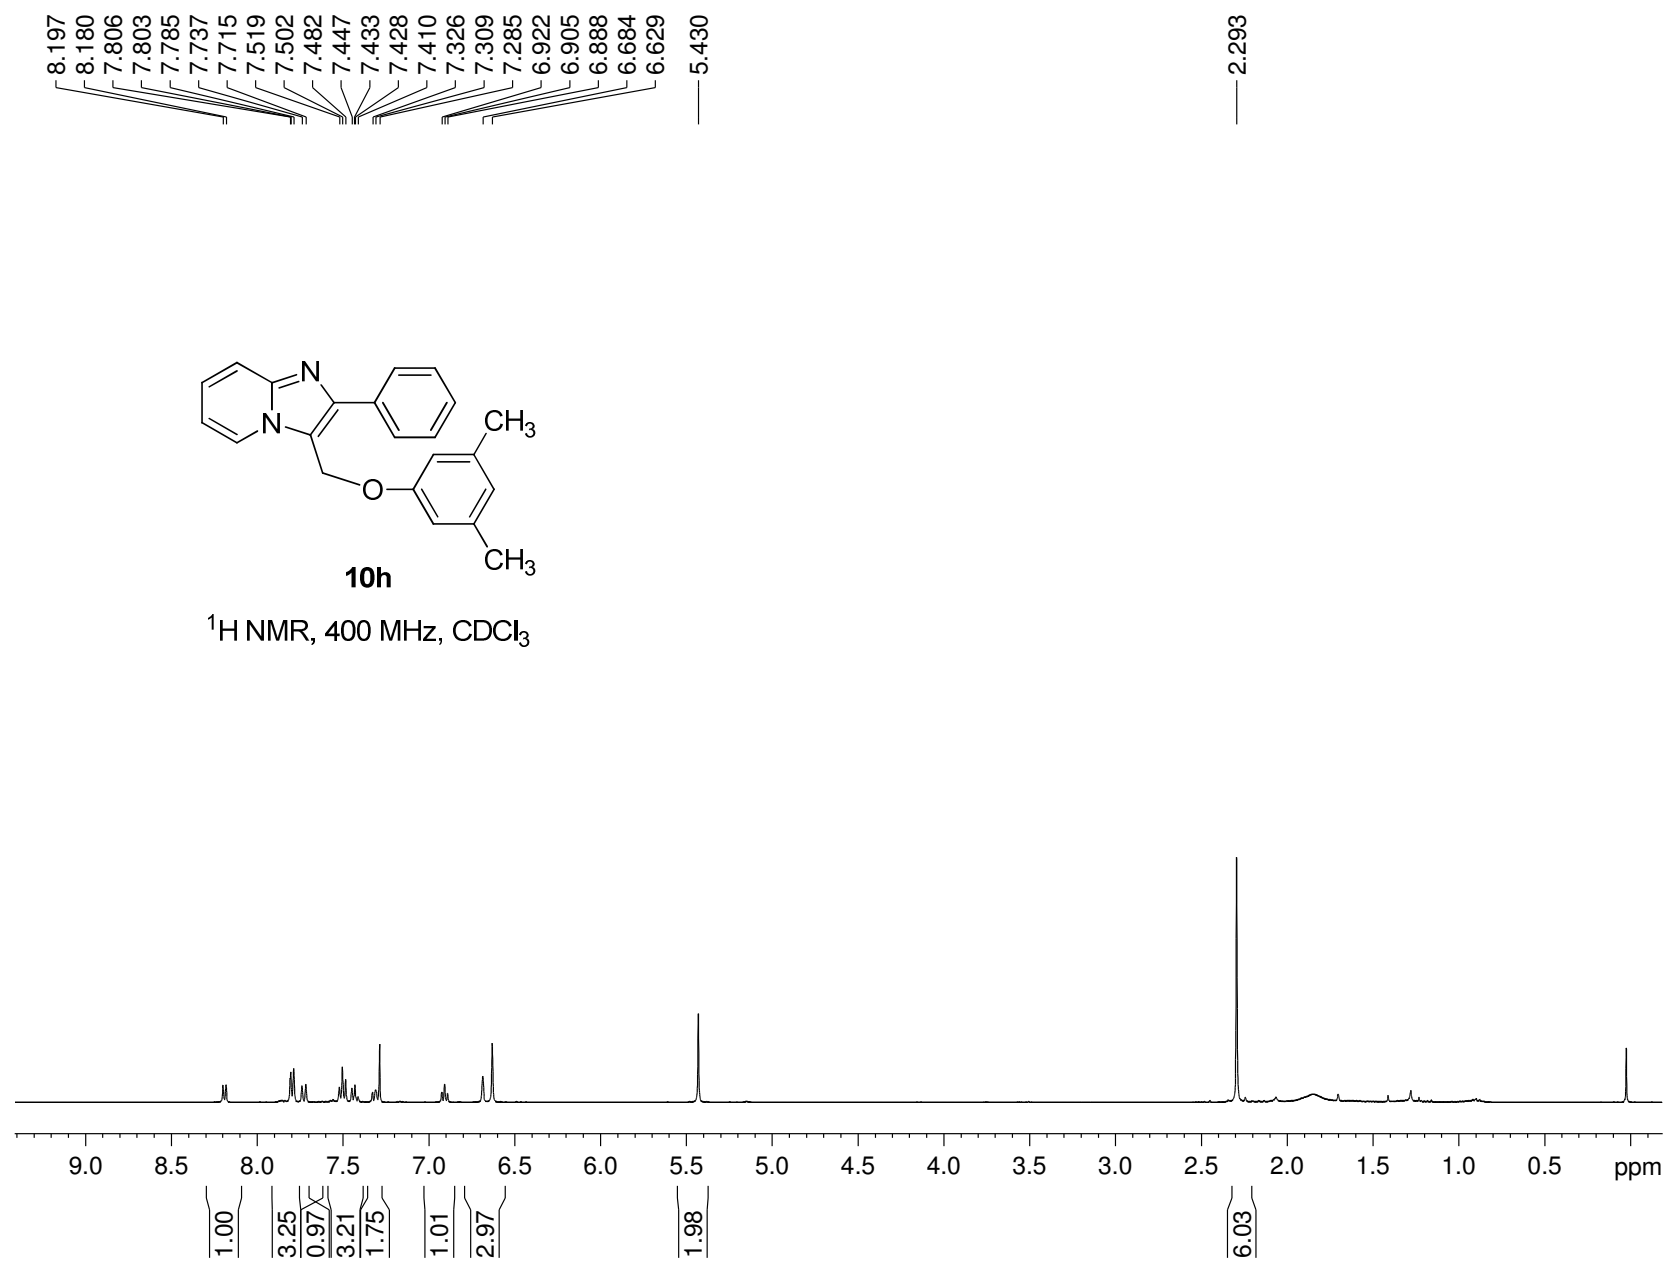

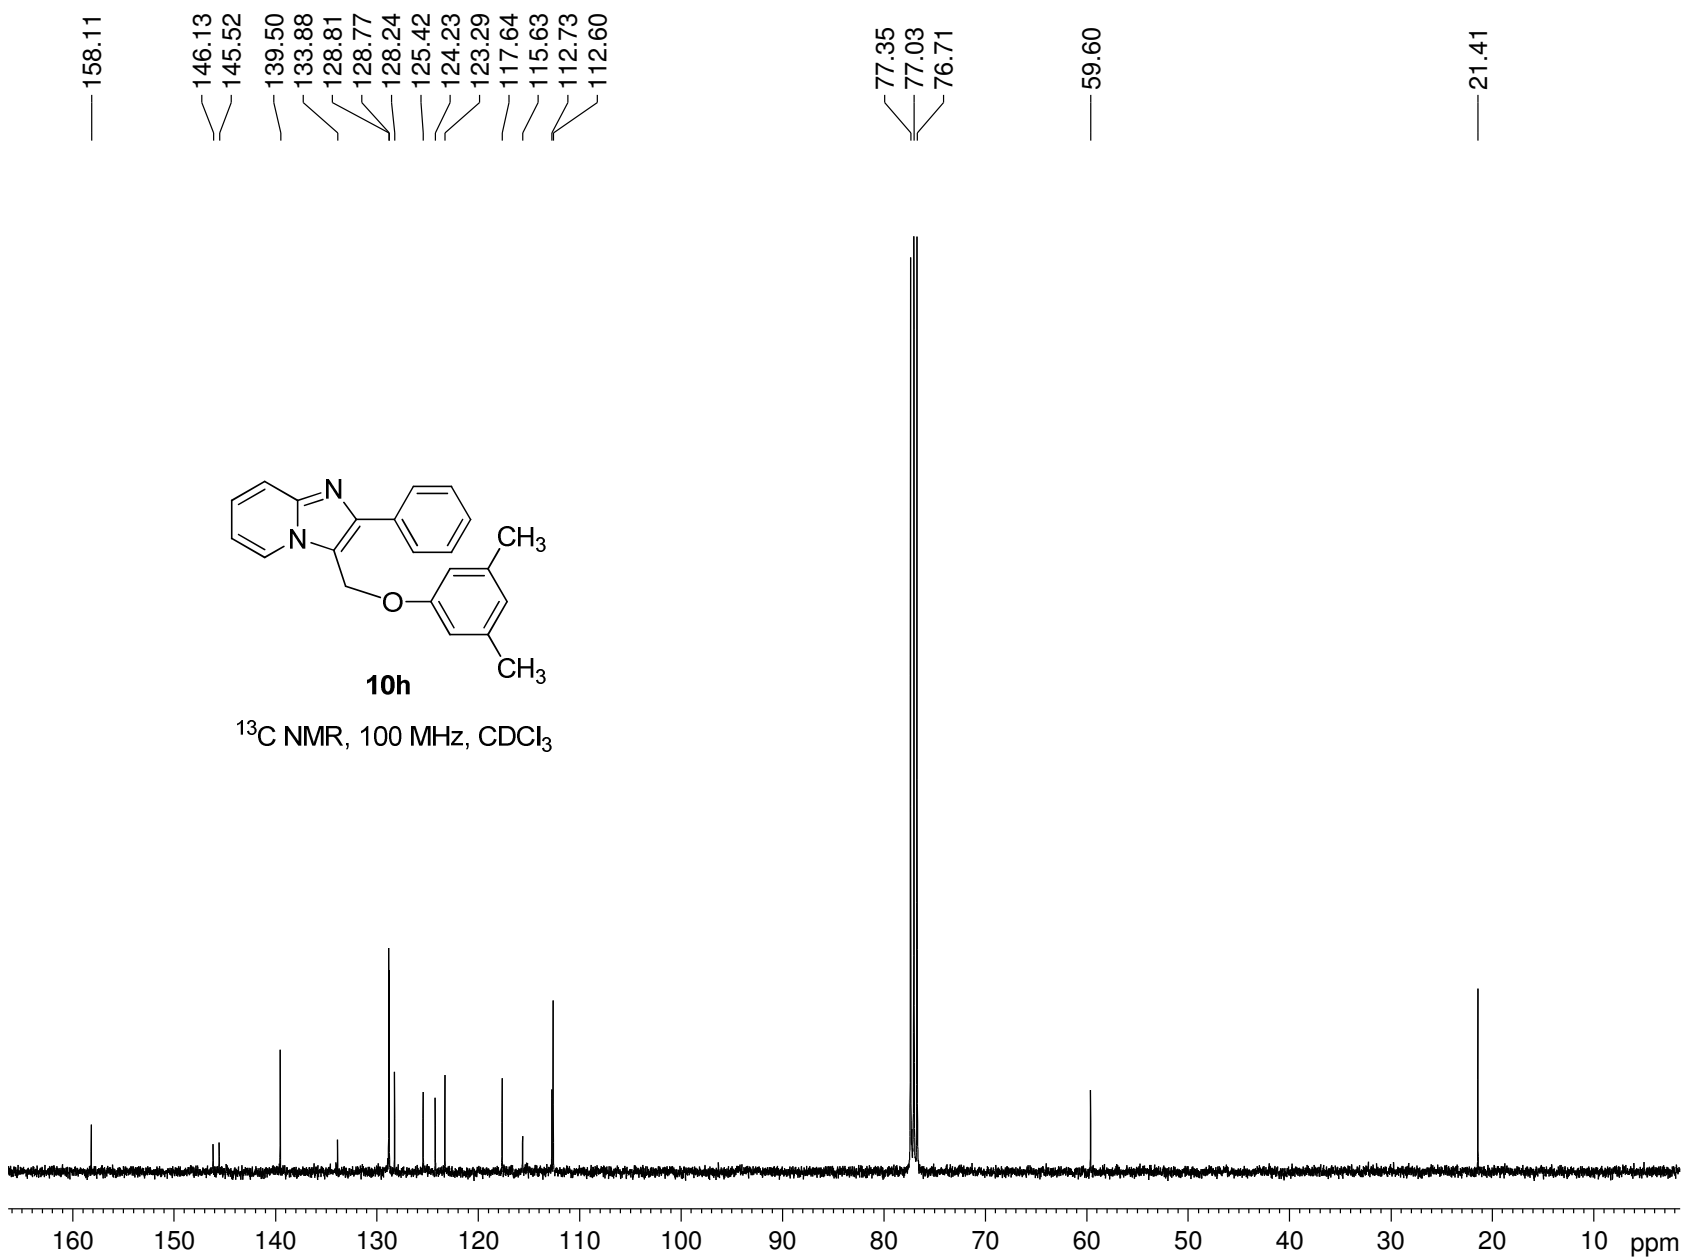

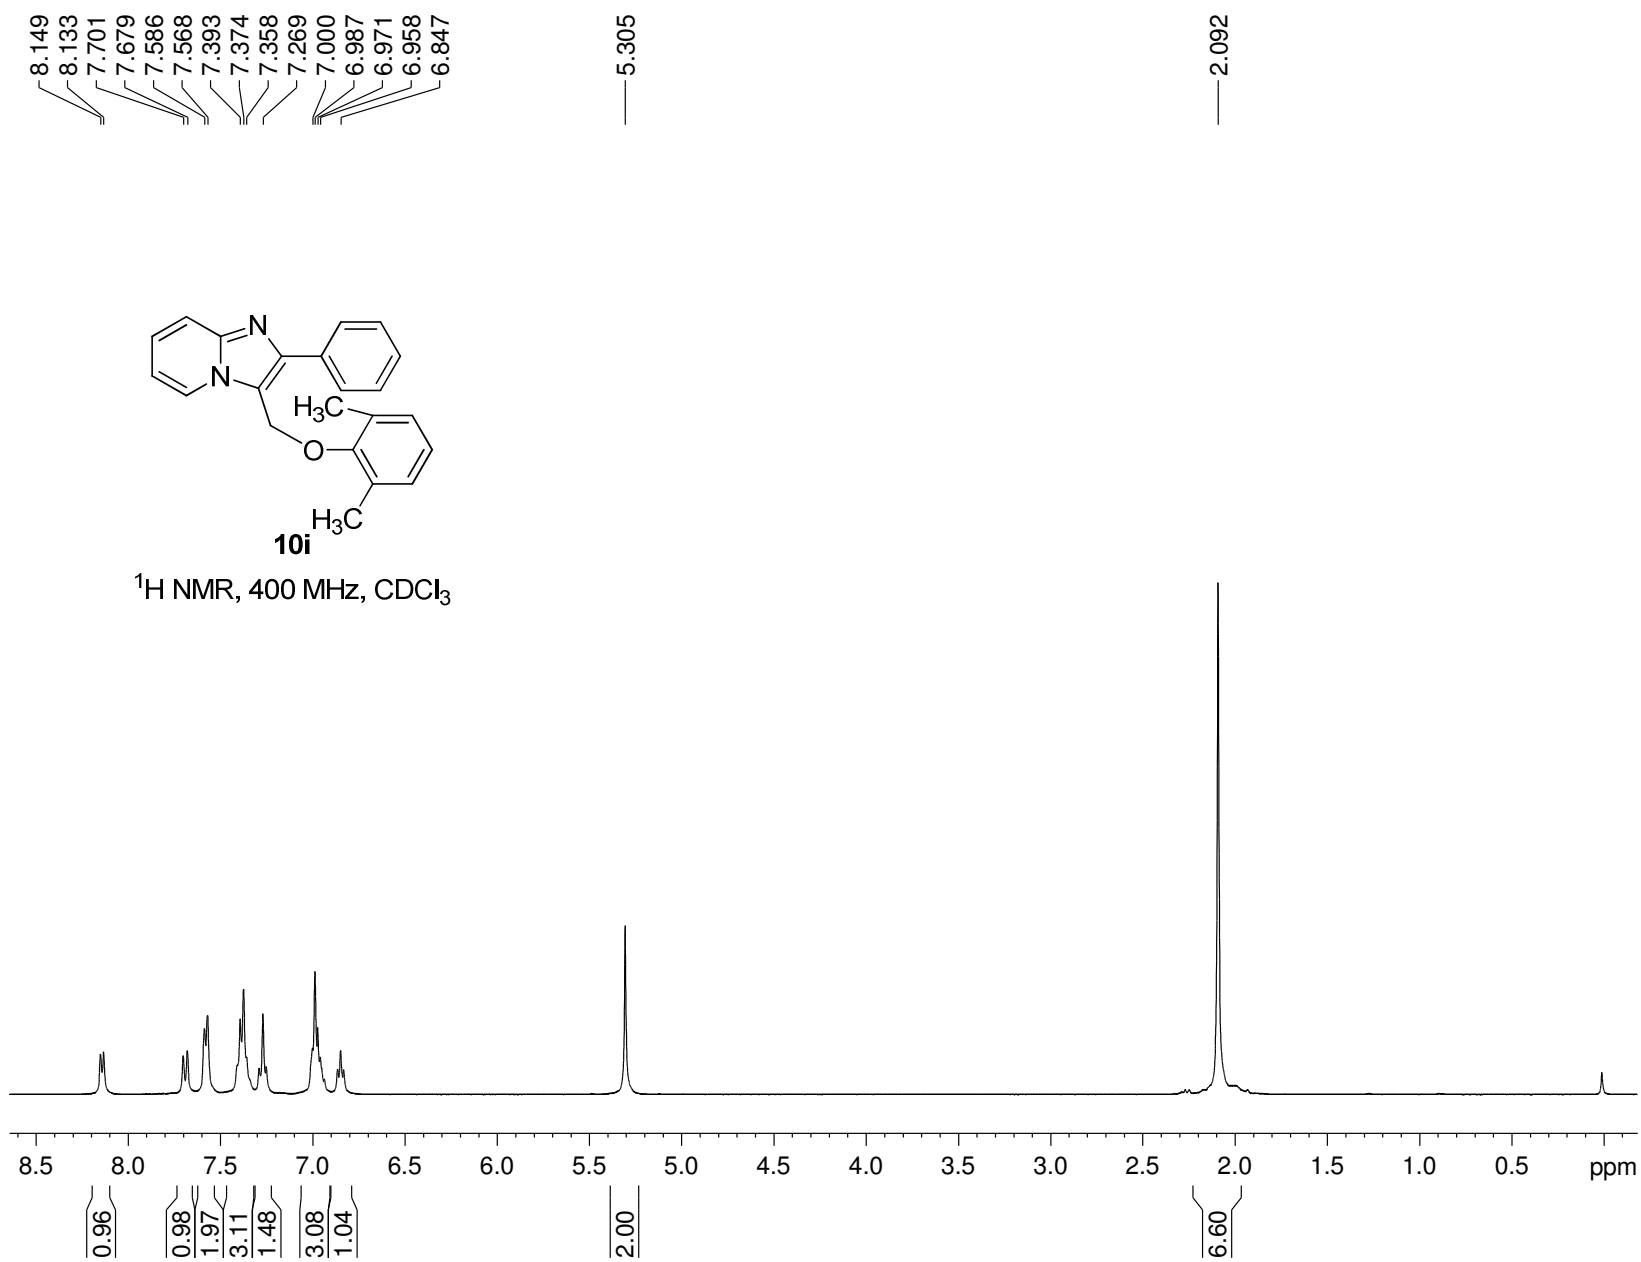

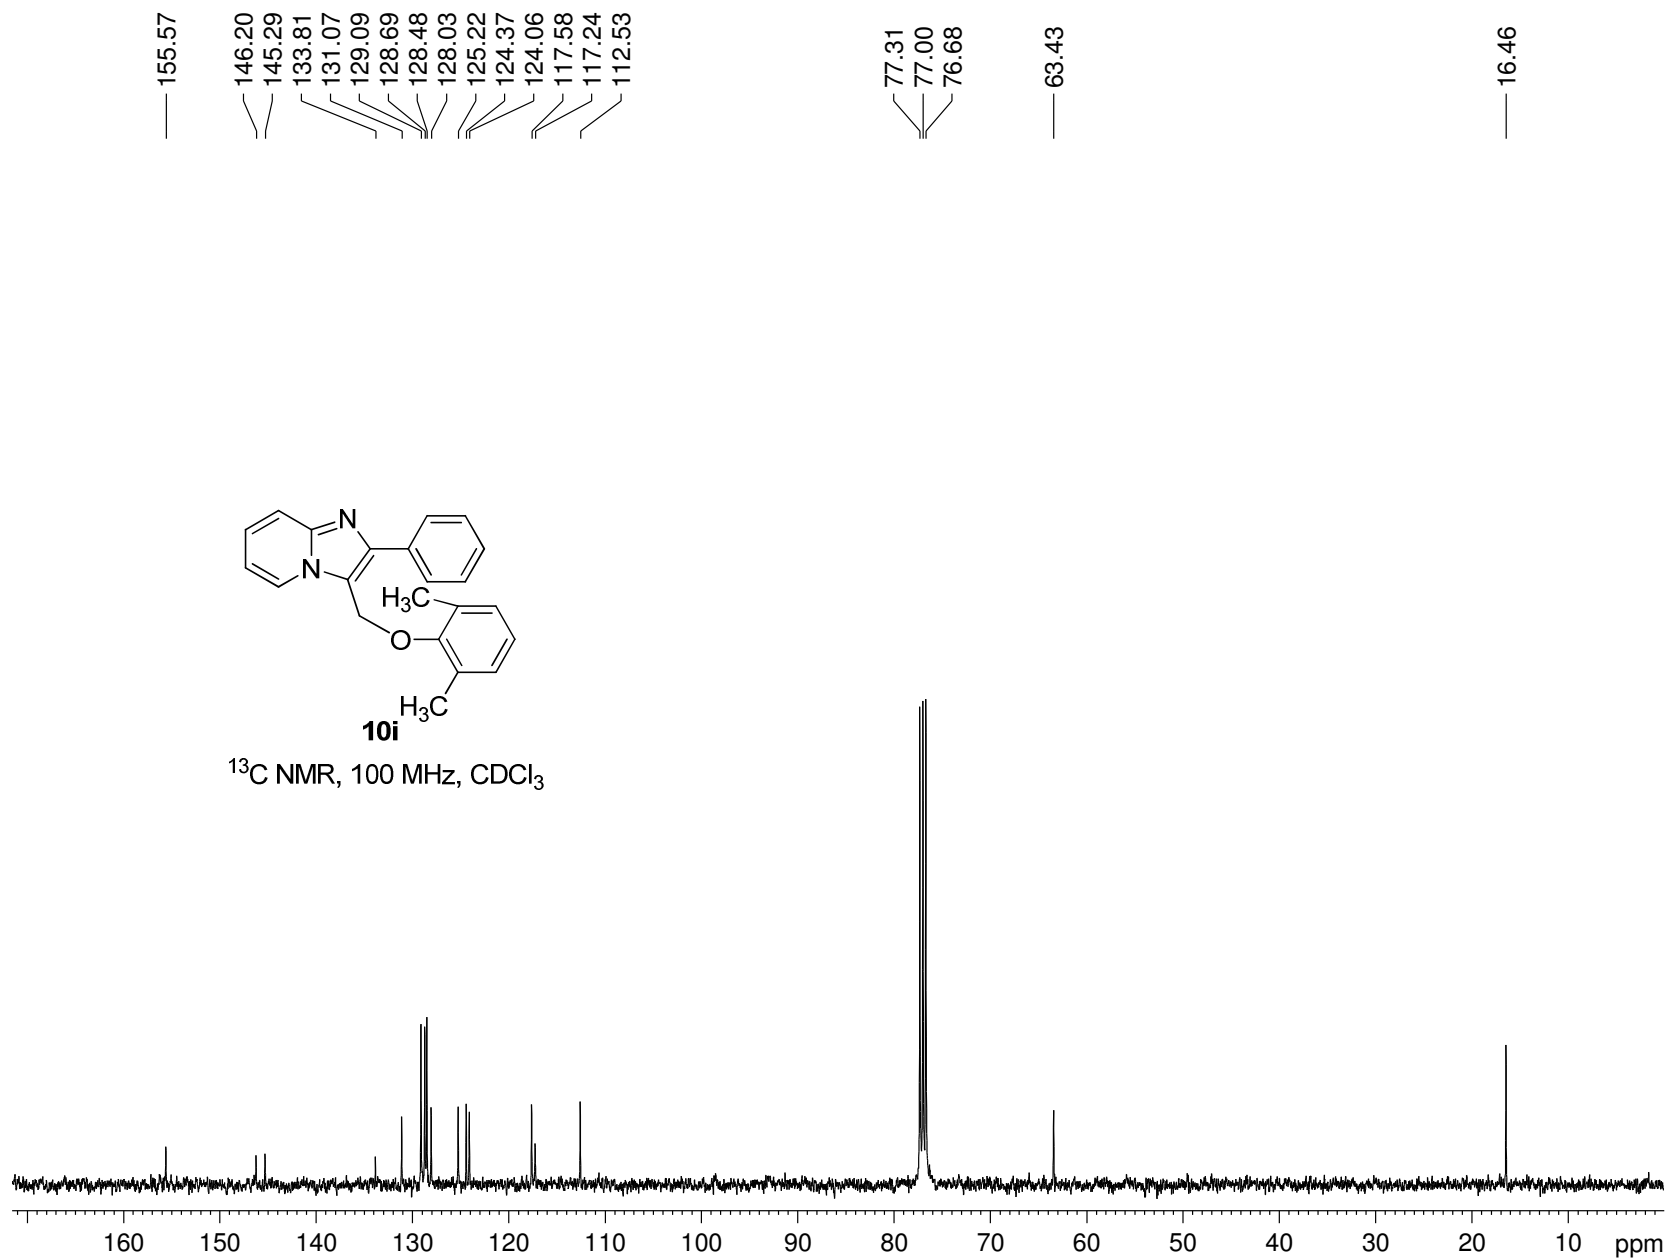

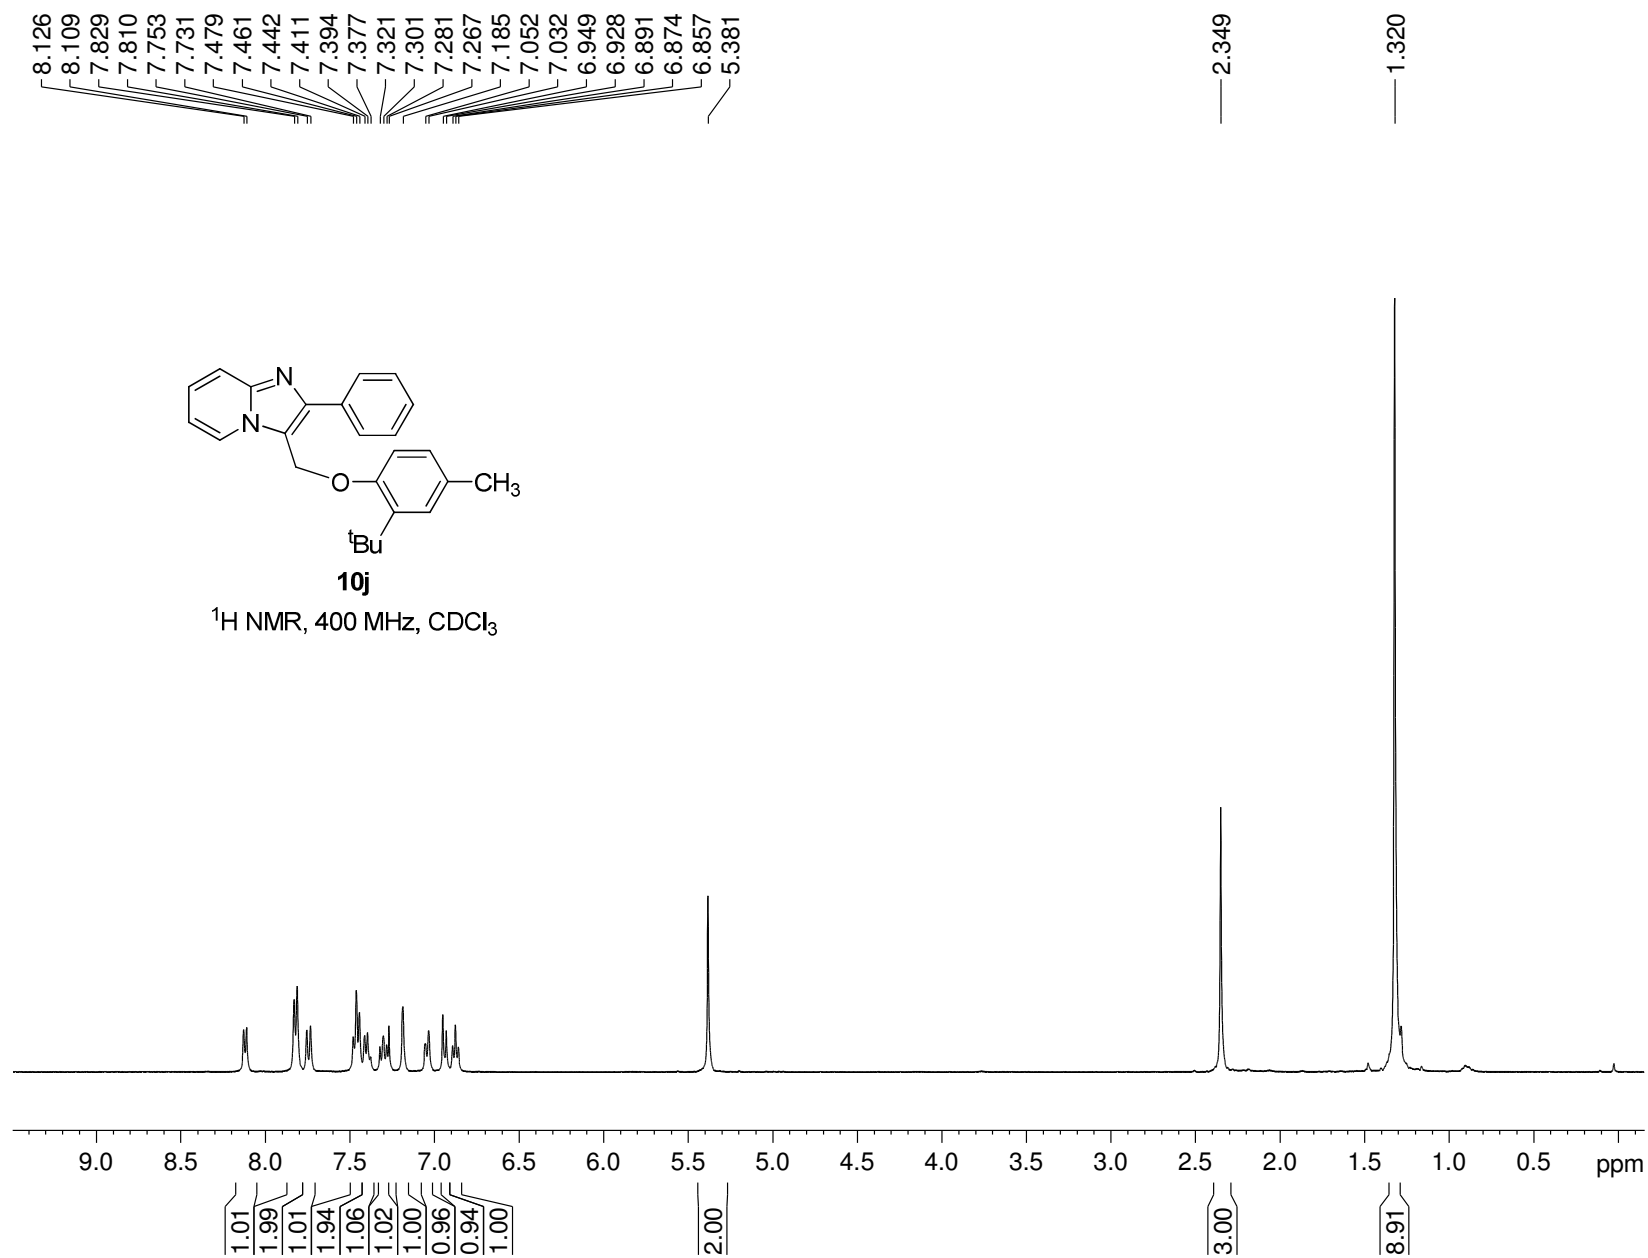

— 154.96  
 — 146.15  
 — 145.49  
 — 138.13  
 — 133.83  
 — 129.99  
 — 128.72  
 — 128.62  
 — 128.14  
 — 127.92  
 — 127.17  
 — 125.29  
 — 123.80  
 — 117.66  
 — 115.69  
 — 112.60  
 — 111.54

— 77.32  
 — 77.00  
 — 76.68

— 59.43

— 34.74

— 29.83

— 20.77

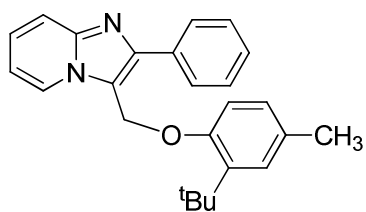

**10j**

$^{13}\text{C}$  NMR, 100 MHz,  $\text{CDCl}_3$

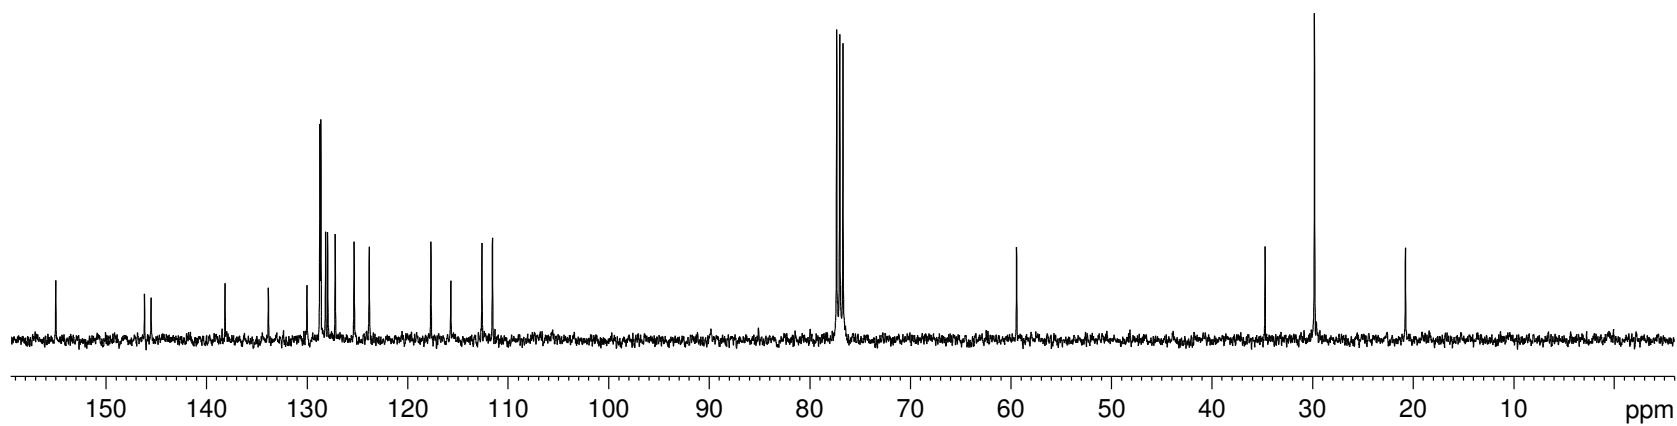

8.123  
8.106  
7.817  
7.799  
7.753  
7.731  
7.473  
7.455  
7.436  
7.422  
7.416  
7.392  
7.305  
7.268  
7.231  
6.985  
6.964  
6.884  
6.867  
6.851

5.393

1.348  
1.327

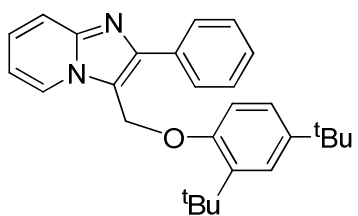

**10k**

$^1\text{H}$  NMR, 400 MHz,  $\text{CDCl}_3$

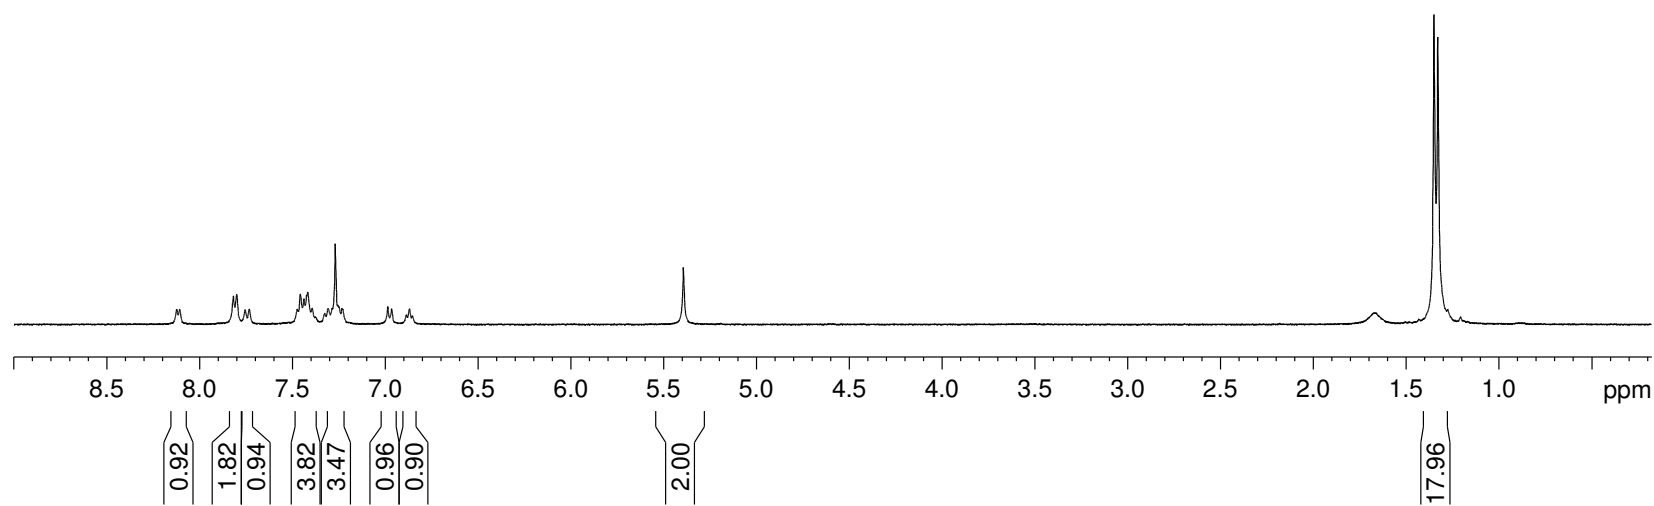

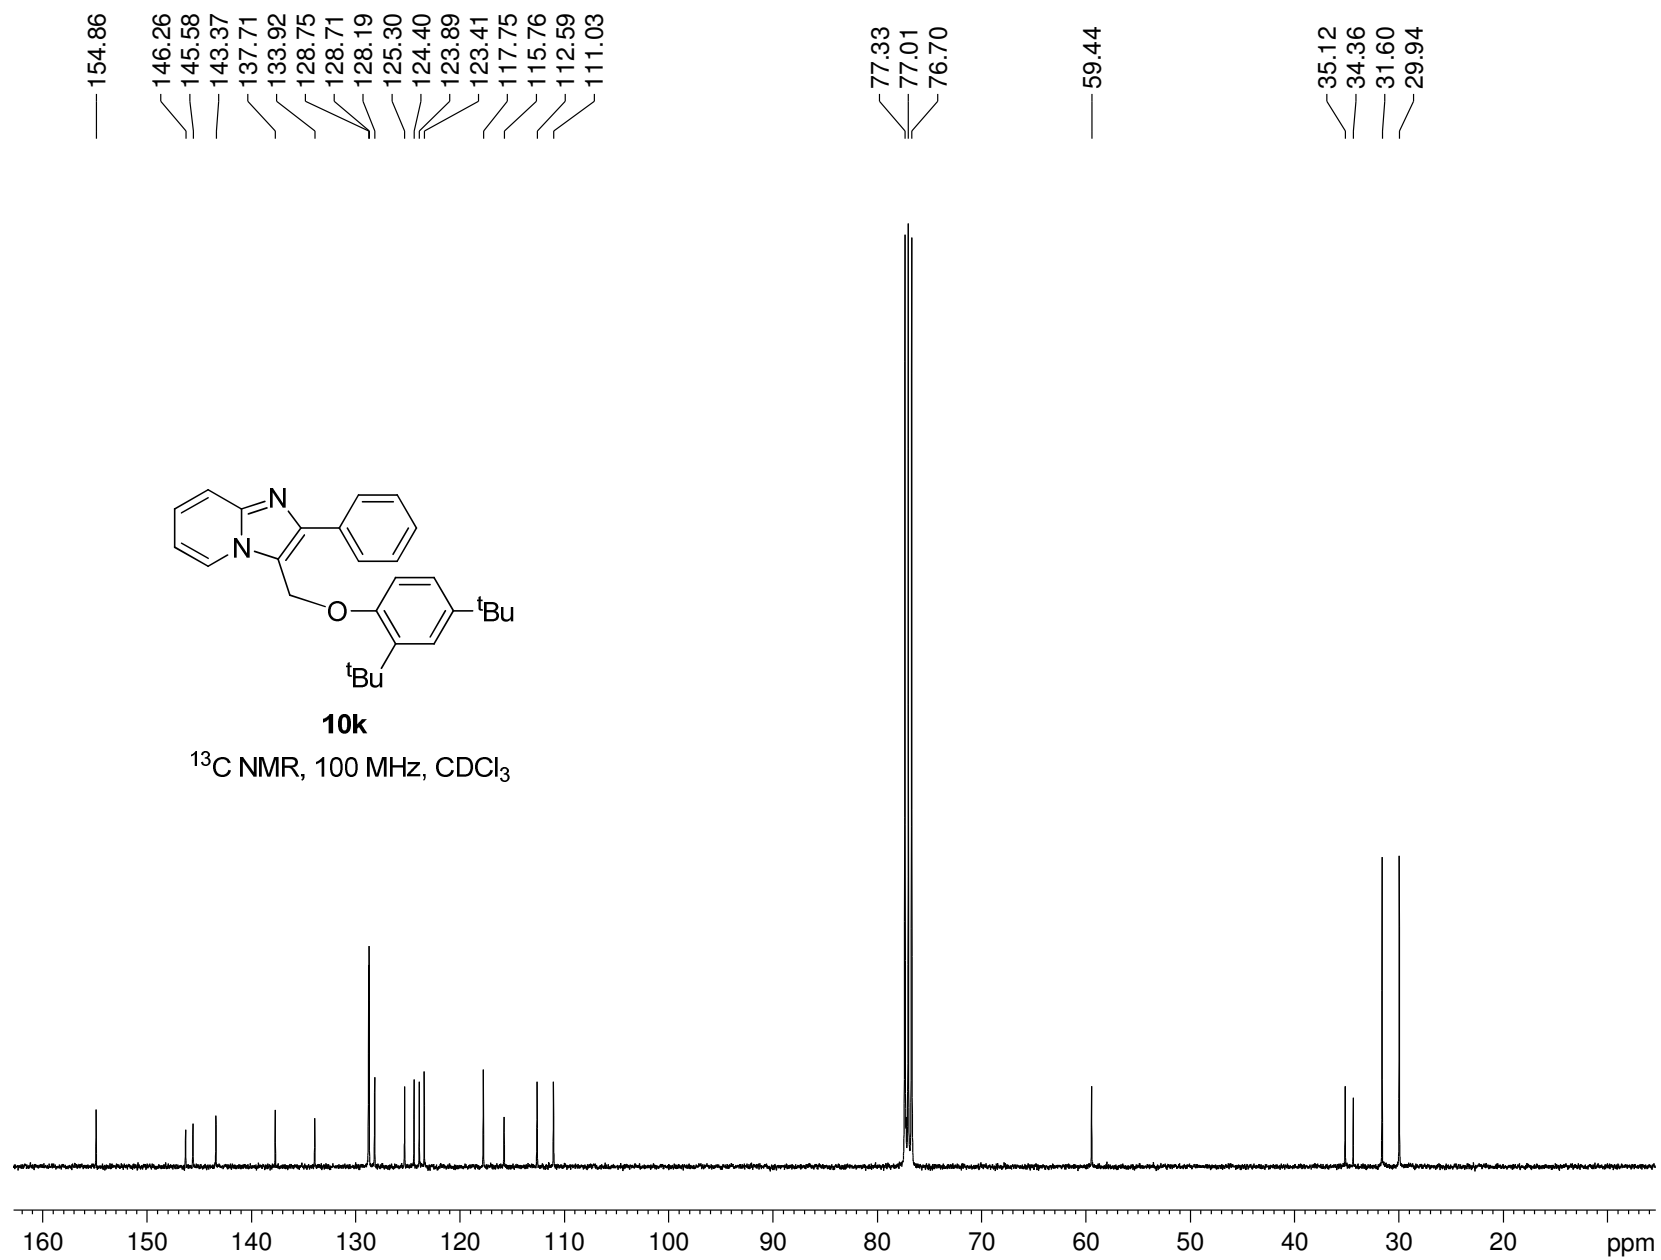



8.188  
8.171  
7.714  
7.692  
7.607  
7.603  
7.598  
7.587  
7.584  
7.420  
7.406  
7.397  
7.391  
7.386  
7.382  
7.371  
7.369  
7.305  
7.302  
7.287  
7.281  
7.265  
7.262  
6.886  
6.883  
6.868  
6.866  
6.851  
6.849  
6.814  
5.281

2.257  
2.067

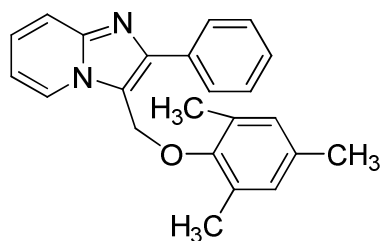

**10I**

$^1\text{H}$  NMR, 400 MHz,  $\text{CDCl}_3$

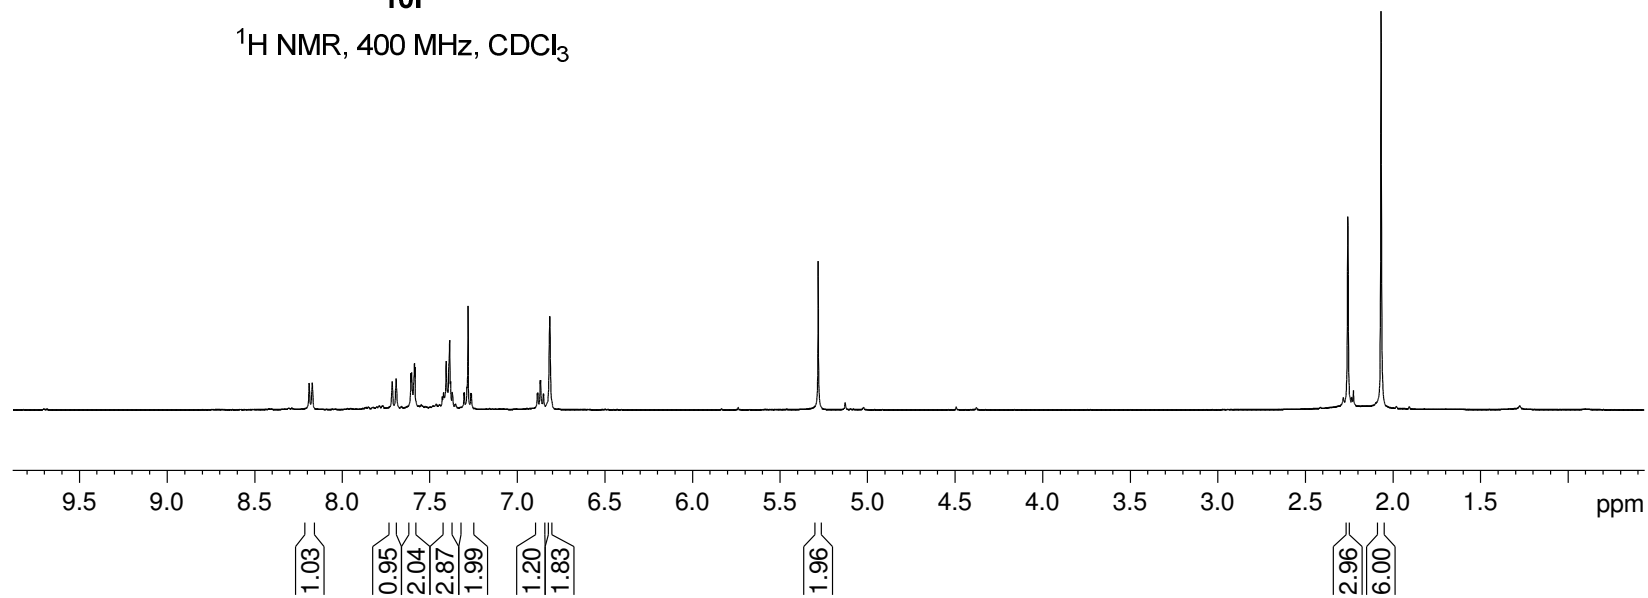

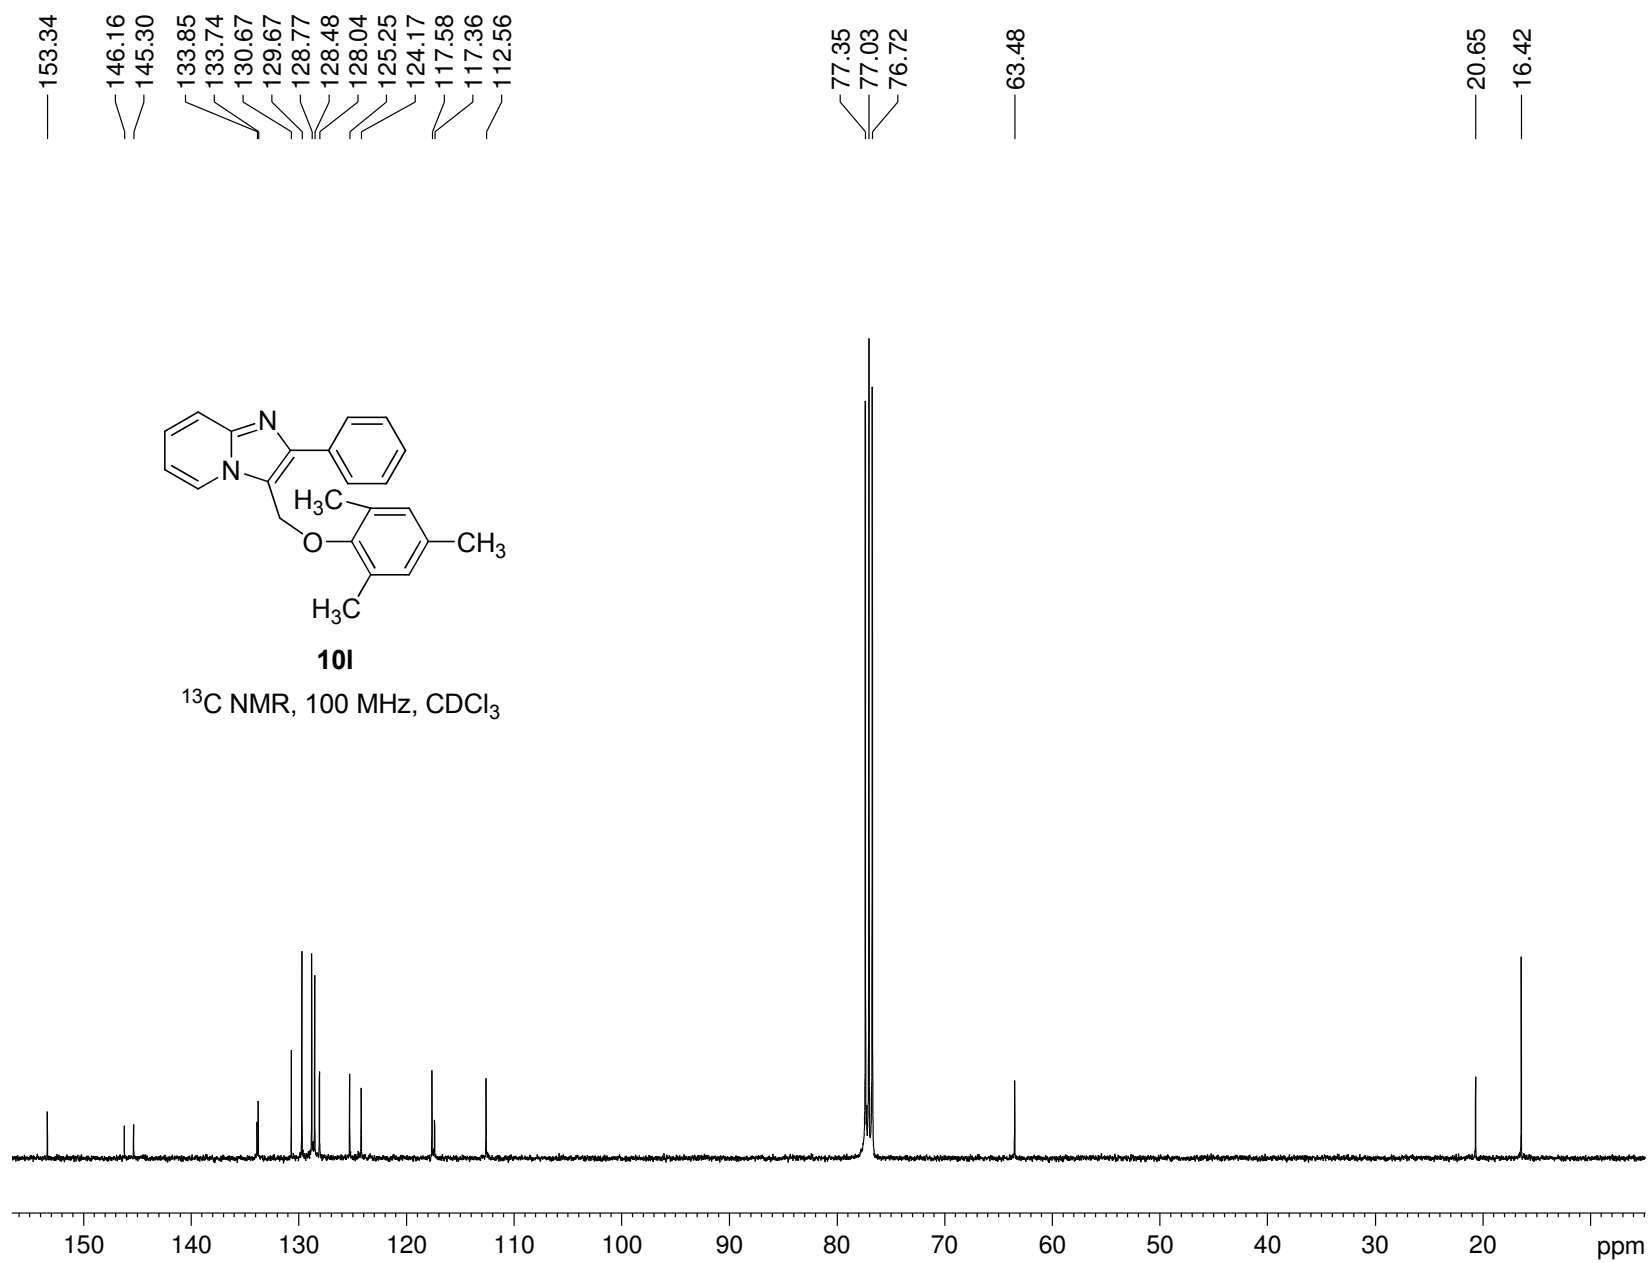

8.479  
8.462  
7.736  
7.715  
7.398  
7.377  
7.345  
7.298  
7.266  
7.107  
7.088  
6.985  
6.968  
6.952

—4.871

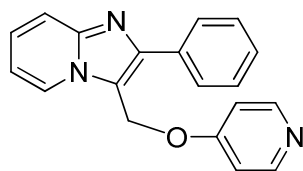

**10m**

$^1\text{H}$  NMR, 400 MHz,  $\text{CDCl}_3$

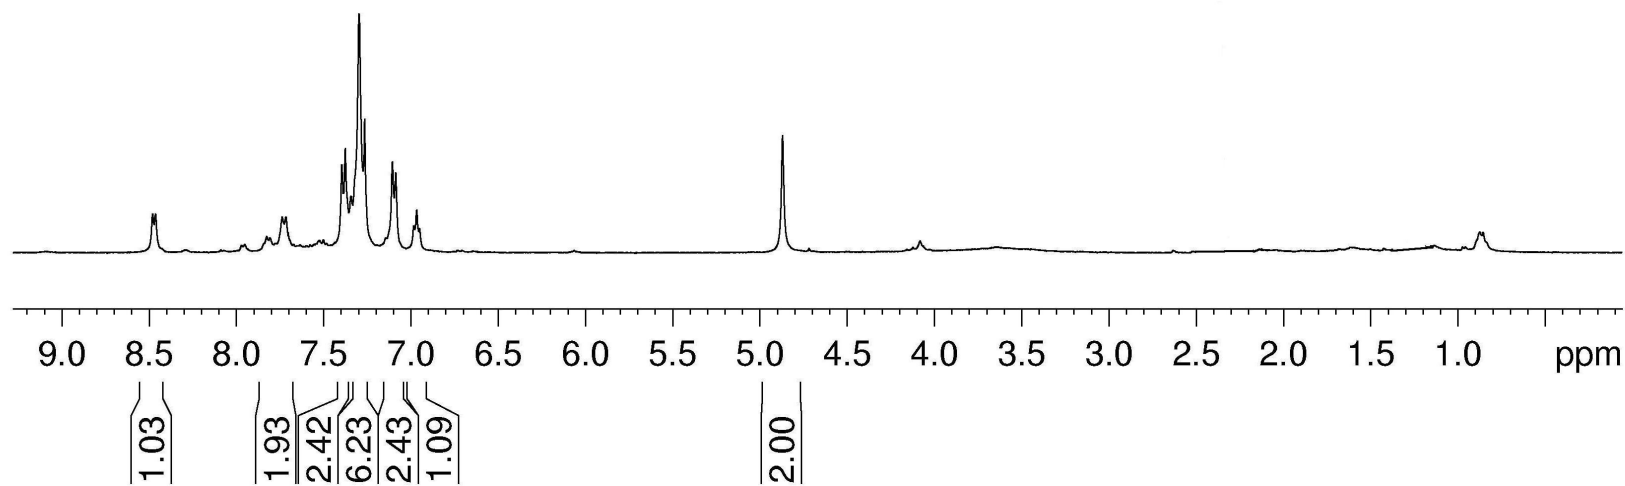

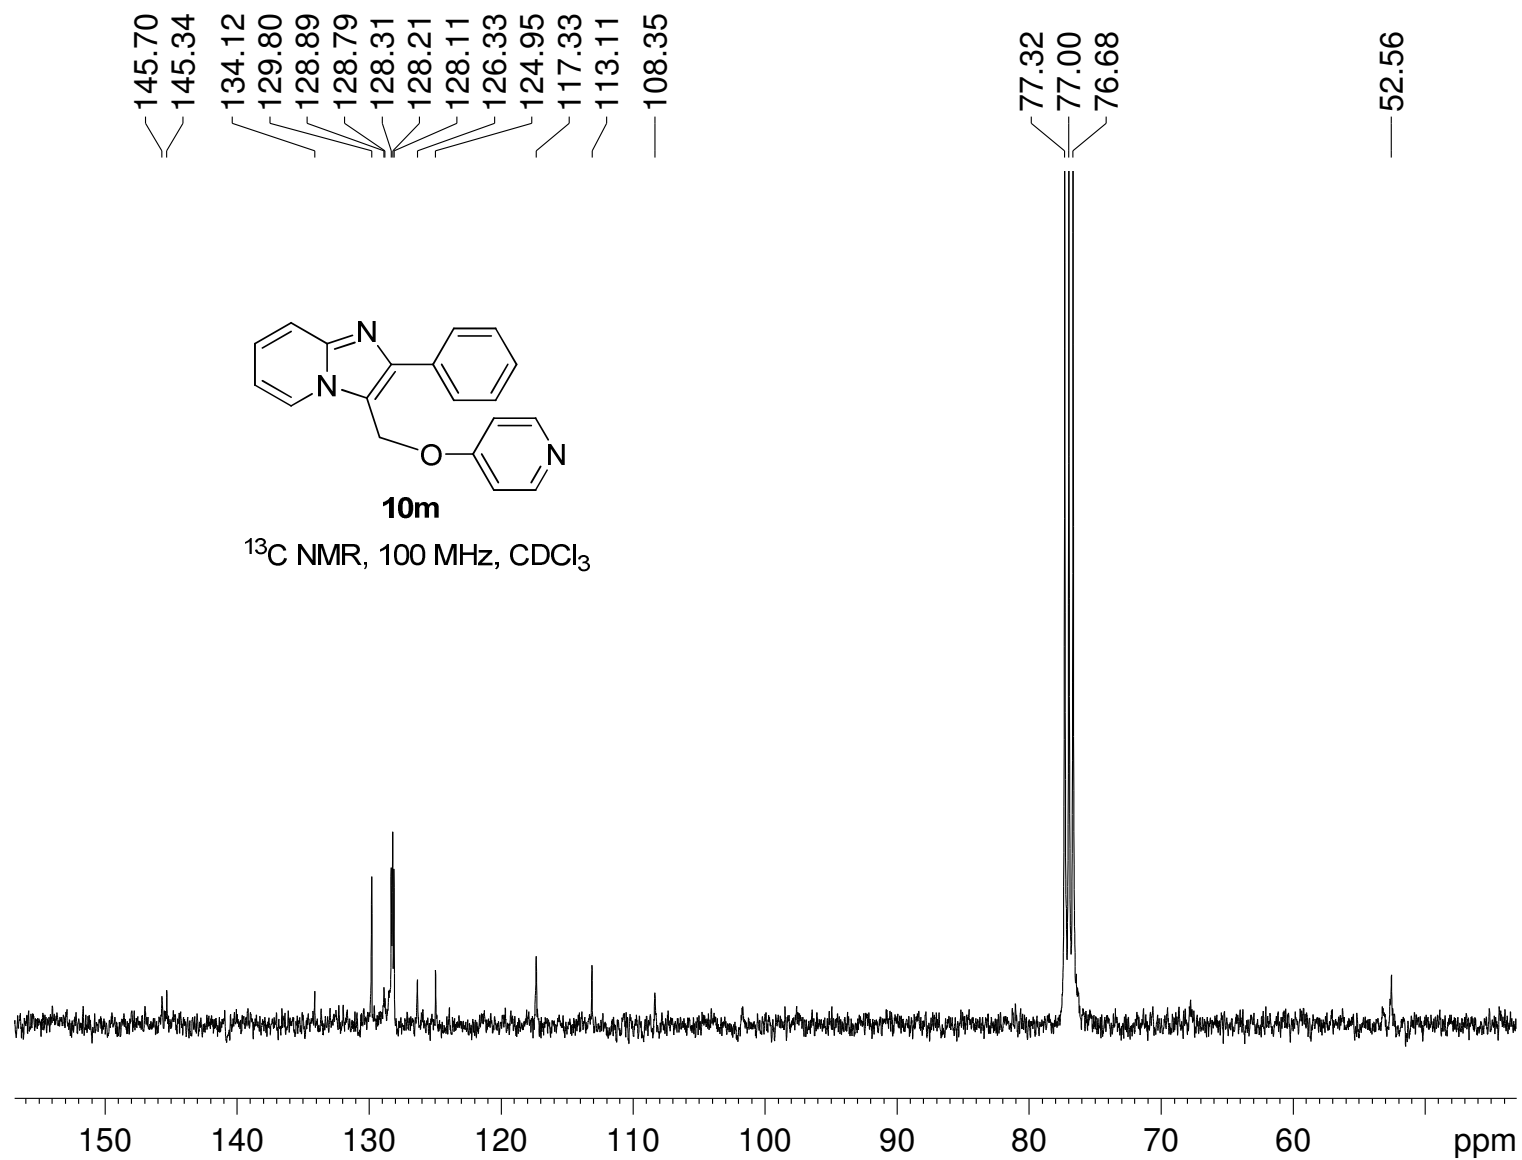

Supplement: f1 [file 296792.f1.pdf]
